# Supplementary material for: Facile one-pot fabrication of a silica gel-supported chiral phase-transfer catalyst—N-(2-cyanobenzyl)-O(9)-allyl-cinchonidinium salt
Source: Royal Society of Chemistry journal article supplement (doi:10.1039/c4cy01518e), 2015-01-01

Electronic Supplementary Material (ESI) for Journal Name.  
This journal is © The Royal Society of Chemistry 2014

## Electronic Supporting Information

### Facile one-pot fabrication of silica gel-supported chiral phase-transfer catalyst—*N*-(2-cyanobenzyl)-*O*(9)-allyl-cinchonidinium salt

Dandan Feng,<sup>a</sup> Jinghan Xu,<sup>a</sup> Jingwei Wan,<sup>a</sup> Bing Xie <sup>\*b</sup> and Xuebing Ma<sup>\*a</sup>

#### Table of contents

|                                                                                                         |            |
|---------------------------------------------------------------------------------------------------------|------------|
| <b>Preparation of chiral phase-transfer catalyst CDPTC .....</b>                                        | <b>S2</b>  |
| General procedure for <i>N</i> -(2-cyanobenzyl)cinchonidinium bromide .....                             | S2         |
| General procedure for <i>N</i> -(2-cyanobenzyl)- <i>O</i> (9)-allyl-cinchonidinium bromide (CDPTC)..... | S2         |
| <b>Characterization data of <math>\alpha</math>-alkylation products .....</b>                           | <b>S3</b>  |
| <b>X-ray diffraction of SiO<sub>2</sub>@CDPTC .....</b>                                                 | <b>S32</b> |
| <b>The recovery and reuse of catalyst .....</b>                                                         | <b>S32</b> |
| <b>HPLC chromatogram of various electrophiles catalyzed by homogeneous CDPTC .....</b>                  | <b>S34</b> |
| <b>N<sub>2</sub> adsorption–desorption isotherm of deeply hydrolytic SiO<sub>2</sub>@CDPTC .....</b>    | <b>S37</b> |

**An analogues of CDPTC.....S38**

## Preparation of chiral phase-transfer catalyst CDPTC

### General procedure for *N*-(2-cyanobenzyl)cinchonidinium bromide

In the 250 mL round-bottomed flask, a mixture of cinchonidine (2.9 g, 10.0 mmol) and 2-cyanobenzyl bromide (2.1 g, 11.0 mmol) in toluene (100 mL) was stirred at 65°C for 12 h. The reaction mixture was filtered, washed with toluene (15 mL×3). The crude solid was recrystallized from methanol/ether (225 mL, *v/v*=1/8) to afford the white *N*-(2-cyanobenzyl)cinchonidinium bromide (4.7 g, 95%).

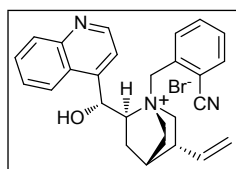

$^1\text{H NMR}$  (300.1 MHz,  $\text{CDCl}_3$ , TMS)  $\delta$  8.86 (d,  $^3J = 4.3$  Hz, 1H, Ar-H), 8.47 (d,  $^3J = 7.6$  Hz, 1H, Ar-H), 8.21 (d,  $^3J = 7.5$  Hz, 1H, Ar-H), 7.95 (d,  $^3J = 7.8$  Hz, 1H, Ar-H), 7.78 (d,  $^3J = 4.3$  Hz, 1H, Ar-H), 7.63 (dd,  $^3J = 9.6, 5.6$  Hz, 2H, Ar-H), 7.56 – 7.43 (m, 3H, Ar-H), 6.68 (s, 1H, OCH), 6.08 (d,  $^3J = 10.0$  Hz, 1H, =CH=), 5.49 (ddd,  $^3J = 16.8, 10.4, 6.1$  Hz, 2H, =CH<sub>2</sub>), 5.17 (d,  $^3J = 17.2$  Hz, 1H, N<sup>+</sup>-CH), 4.95 (d,  $^3J = 10.4$  Hz, 2H, N<sup>+</sup>-CH<sub>2</sub>), 4.02 (d,  $^3J = 9.5$  Hz, 2H, N<sup>+</sup>-CH<sub>2</sub>), 3.17 – 2.98 (m, 2H, N<sup>+</sup>-CH<sub>2</sub>), 2.54 (s, 1H, -OH), 2.17 (t,  $^3J = 11.1$  Hz, 1H, CH), 2.01 (dd,  $^3J = 22.5, 9.5$  Hz, 3H, CH, CH<sub>2</sub>), 1.60 – 1.76 (m, 2H, CH<sub>2</sub>).

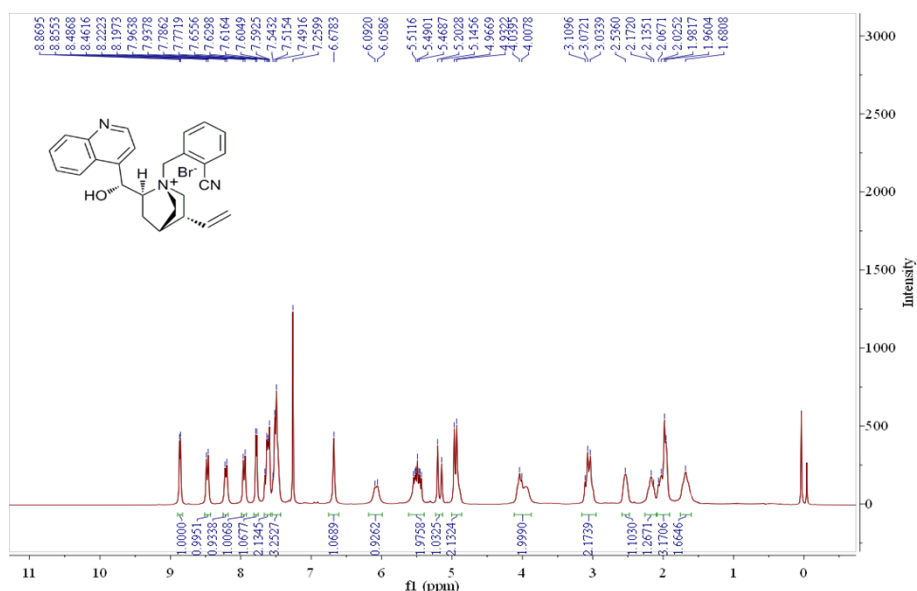

Fig. 1  $^1\text{H NMR}$  spectra of *N*-(2-cyanobenzyl)cinchonidinium bromide

### General procedure for *N*-(2-cyanobenzyl)-O(9)-allylcinchonidinium bromide (CDPTC)

In 250 mL of round-bottomed flask was added *N*-(2-cyanobenzyl)cinchonidinium bromide (4.8 g, 9.8 mmol),  $\text{CH}_2\text{Cl}_2$  (100 mL), allyl bromide (3.6 g, 29.4 mmol) and 50% aqueous KOH solution (5.5 mL, 49.0 mmol), successively. The resulting mixture was stirred vigorously at 25°C for 24 h. Then the mixture was diluted with water (20 mL) and extracted with dichloromethane (50 mL×3). The combined organic phase was dried over  $\text{Na}_2\text{SO}_4$ , filtered and concentrated in *vacuo*. The crude solid was recrystallized from dichloromethane/hexane (220 mL, *v/v*=1/10) to obtain the light yellow solid *N*-(2-cyanobenzyl)-O(9)-allylcinchonidinium bromide (4.7 g, 90%).

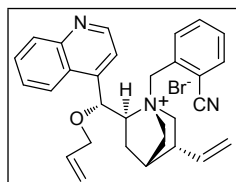

$^1\text{H NMR}$  (300 MHz,  $\text{CDCl}_3$ , TMS)  $\delta$  8.96 (d,  $^3J = 4.3$  Hz, 2H, Ar-H), 8.84 (d,  $^3J = 8.5$  Hz, 1H, Ar-H), 8.13 (d,  $^3J = 8.3$  Hz, 1H, Ar-H), 7.92 (d,  $^3J = 6.4$  Hz, 1H, Ar-H), 7.89 – 7.73 (m, 3H, Ar-H), 7.65 (t,  $^3J = 7.6$  Hz, 2H, Ar-H),

6.91 (d,  $^3J = 12.1$  Hz, 1H, OCH), 6.28–6.09 (m, 2H, -CH=, -CH=), 5.70 (ddd,  $^3J = 16.8, 10.4, 6.2$  Hz, 1H, =CH<sub>2</sub>), 5.41 (d,  $^3J = 17.2$  Hz, 1H, =CH<sub>2</sub>), 5.31 (dd,  $^3J = 13.6, 8.0$  Hz, 2H, =CH<sub>2</sub>), 5.22 (d,  $^3J = 12.5$  Hz, 1H, N<sup>+</sup>-CH), 4.98 (dd,  $^3J = 23.9, 11.3$  Hz, 2H, N<sup>+</sup>-CH<sub>2</sub>), 4.83 – 4.56 (m, 2H, OCH<sub>2</sub>), 4.16 (d,  $^3J = 6.1$  Hz, 2H, N<sup>+</sup>-CH<sub>2</sub>), 3.16 (dd,  $^3J = 15.4, 7.0$  Hz, 2H, N<sup>+</sup>-CH<sub>2</sub>), 2.63 (s, 1H, CH), 2.17 (dd,  $^3J = 16.7, 6.2$  Hz, 1H, CH), 2.06 (d,  $^3J = 7.0$  Hz, 3H, CH<sub>2</sub>, CH<sub>2</sub>), 1.82 (d,  $^3J = 6.6$  Hz, 1H, CH<sub>2</sub>).

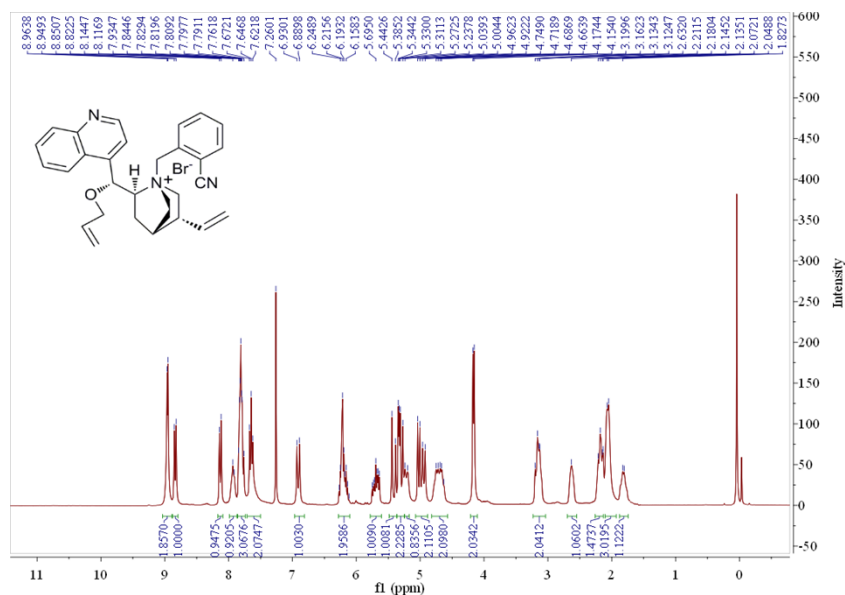

**Fig. 2** <sup>1</sup>H NMR of *N*-(2-cyanobenzyl)-*O*(9)-allylcinchonidinium bromide

## Characterization data of $\alpha$ -alkylation products

### *tert*-Butyl 3-phenyl-2-(diphenylmethyleneamino)propanoate (Table 1).

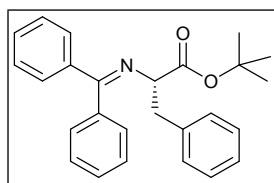

<sup>1</sup>H NMR (300.1 MHz, CDCl<sub>3</sub>, TMS)  $\delta$  7.52 (d,  $^3J = 7.0$  Hz, 2H, Ph-H), 7.30–7.00 (m, 11H, Ph-H), 6.54 (d,  $^3J = 6.4$  Hz, 2H, Ph-H), 4.06 (dd,  $^3J = 4.4$  Hz, 4.4 Hz, 1H, NCH), 3.22–3.07 (m, 2H, CH<sub>2</sub>), 1.39 (s, 9H, CH<sub>3</sub>); <sup>13</sup>C NMR (75.0 MHz, CDCl<sub>3</sub>, TMS):  $\delta$  170.8, 170.2 (C=N, C=O), 139.5, 138.3, 137.5, 136.3, 132.4, 130.0, 129.8, 129.3, 128.6, 128.4, 128.2, 128.1, 128.0, 128.0, 127.9, 127.6, 126.6, 126.1(Ph), 81.1 (O-C), 67.9 (NCH), 39.5 (CH<sub>2</sub>), 28.0 (CH<sub>3</sub>); HPLC analysis: Phenomenex Lux 5u Amylose-2, hexane/dioxane = 95/5, 254 nm, flow rate = 0.5 ml/min, retention times: 12.8 min (R), 15.3 min (S).

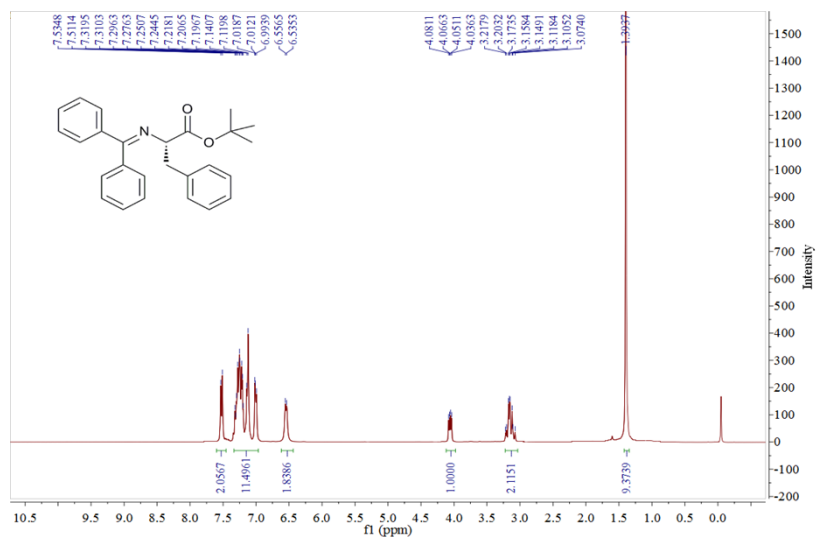

Fig.3  $^1\text{H}$  NMR spectra of *tert*-butyl 3-phenyl-2-(diphenylmethyleneamino)propanoate

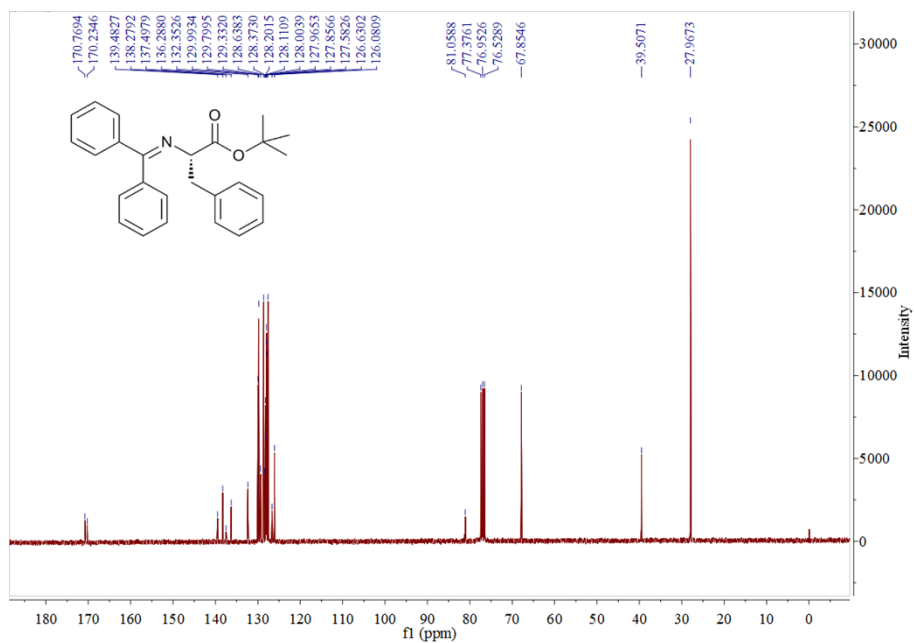

Fig.4  $^{13}\text{C}$  NMR spectra of *tert*-butyl 3-phenyl-2-(diphenylmethyleneamino)propanoate

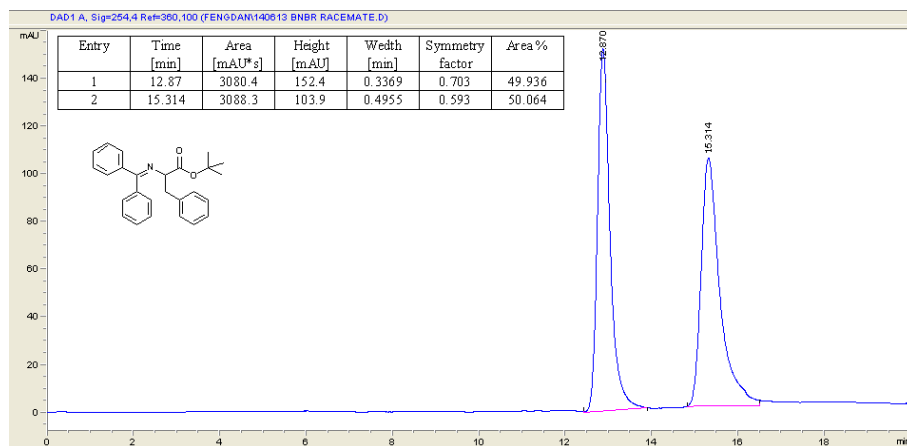

Fig.5 The HPLC chromatogram of racemic *tert*-butyl 3-phenyl-2-(diphenylmethyleneamino)propanoate

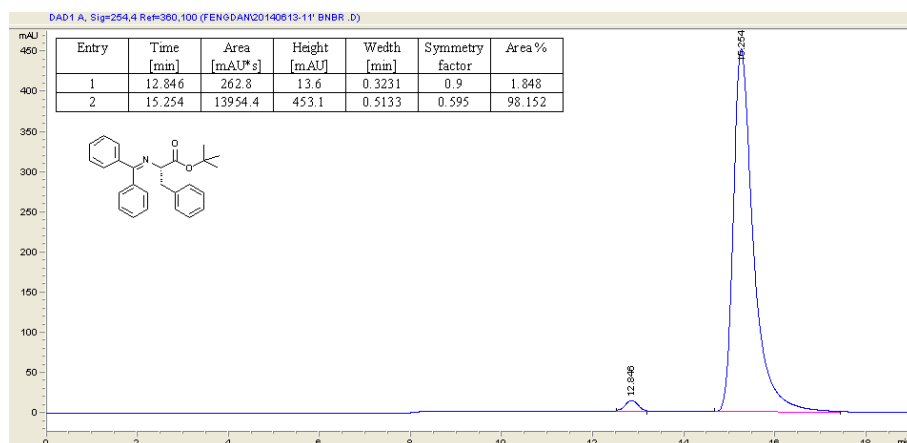

**Fig.6** The HPLC chromatogram of *tert*-butyl 3-phenyl-2-(diphenylmethyleamino)propanoate catalyzed by SiO<sub>2</sub>@CDPTC

***tert*-Butyl 3-(4-trifluoromethylphenyl)-2-(diphenylmethyleamino)propanoate (Entry 1 in Table 2).**

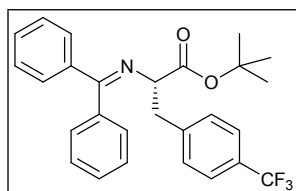

<sup>1</sup>H NMR (300.1 MHz, CDCl<sub>3</sub>, TMS): δ 7.54 (d, <sup>3</sup>J = 7.1 Hz, 2H, Ph-H), 7.40 (d, <sup>3</sup>J = 7.9 Hz, 2H, Ph-H), 7.37–7.21 (m, 6H, Ph-H), 7.13 (d, <sup>3</sup>J = 7.9 Hz, 2H, Ph-H), 6.58 (d, <sup>3</sup>J = 6.4 Hz, 2H, Ph-H), 4.10 (dd, <sup>3</sup>J = 4.4 Hz, 4.4 Hz, 1H, NCH), 3.27–3.14 (m, 2H, CH<sub>2</sub>), 1.41 (s, 9H, CH<sub>3</sub>);

<sup>13</sup>C NMR (75.0 MHz, CDCl<sub>3</sub>, TMS): δ 170.7, 170.4 (C=N, C=O), 142.6 (q, <sup>3</sup>J<sub>C-F</sub> = 1.3 Hz), 139.2, 137.5, 136.0, 132.4, 130.3, 130.1, 130.0, 130.0, 129.7, 128.6, 128.3, 128.2, 128.1, 128.0, 127.4, 126.0 (Ph), 125.2 (q, <sup>2</sup>J<sub>C-F</sub> = 3.8 Hz), 124.9 (q, <sup>1</sup>J<sub>C-F</sub> = 3.8 Hz, CF<sub>3</sub>), 81.4 (O-C), 67.4 (NCH), 39.2 (CH<sub>2</sub>), 27.9 (CH<sub>3</sub>); HPLC analysis: Phenomenex Lux 5u Amylose-2, hexane/dioxane = 95/5, 254 nm, flow rate = 0.5 ml/min, retention times: 12.2 min (R), 13.9 min (S).

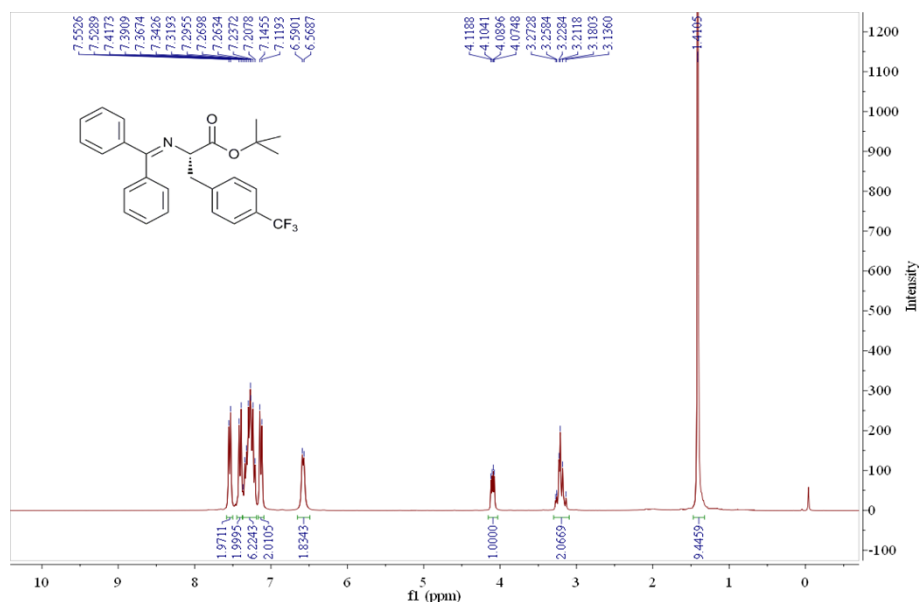

**Fig.7** <sup>1</sup>H NMR spectra of *tert*-butyl 3-(4-trifluoromethylphenyl)-2-(diphenylmethyleamino)propanoate

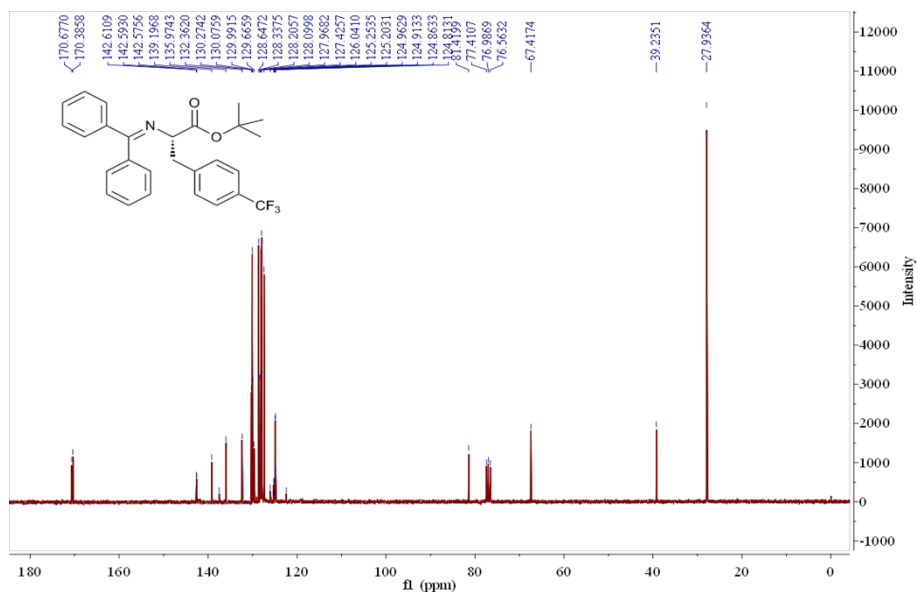

**Fig.8**  $^{13}\text{C}$  NMR spectra of *tert*-butyl 3-(4-trifluoromethylphenyl)-2-(diphenylmethyleamino)propanoate

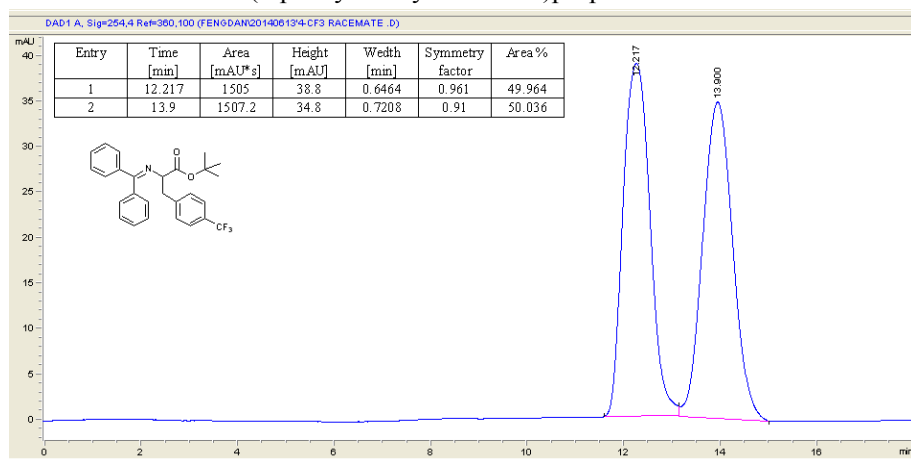

**Fig.9** The HPLC chromatogram of racemic *tert*-butyl 3-(4-trifluoromethylphenyl)-2-(diphenylmethyleamino)propanoate

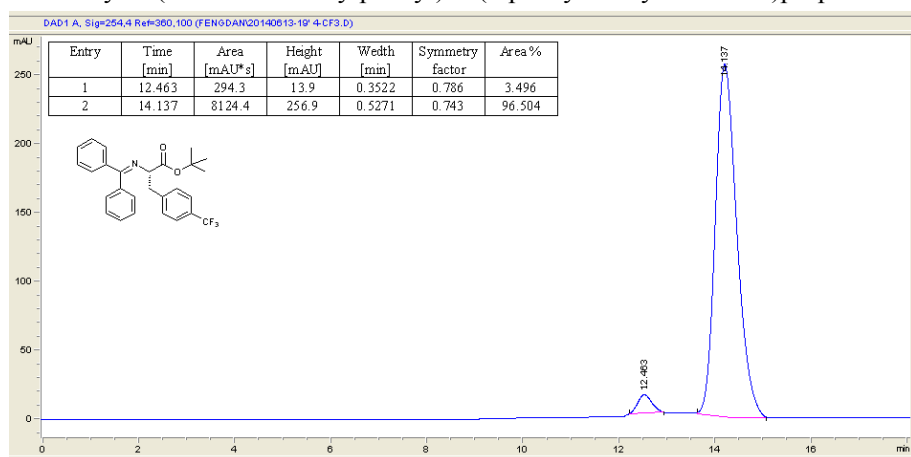

**Fig.10** The HPLC chromatogram of *tert*-butyl 3-(4-trifluoromethylphenyl)-2-(diphenylmethyleamino)propanoate catalyzed by  $\text{SiO}_2@\text{CDPTC}$

*tert*-Butyl 3-(3-trifluoromethylphenyl)-2-(diphenylmethyleamino)propanoate (Entry 2 in Table 2).

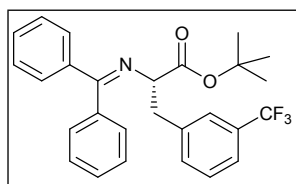

$^1\text{H}$  NMR (300.1 MHz,  $\text{CDCl}_3$ , TMS):  $\delta$  7.52 (d,  $^3J = 7.0$  Hz, 2H, Ph-H), 7.40–7.21 (m, 10H, Ph-H), 6.57 (d,  $^3J = 6.6$  Hz, 2H, Ph-H), 4.09 (dd,  $^3J = 5.6$  Hz, 5.6 Hz, 1H, NCH), 3.23–3.21 (m, 2H,  $\text{CH}_2$ ), 1.41 (s, 9H,  $\text{CH}_3$ );  $^{13}\text{C}$  NMR (75.0 MHz,  $\text{CDCl}_3$ , TMS):  $\delta$  170.8, 170.3 (C=N, C=O), 139.3, 139.2, 136.1, 133.4, 133.4, 132.4, 130.5, 130.2, 130.1, 130.0, 128.6, 128.4, 128.3, 128.2, 128.1, 127.9, 127.4, 126.4 (q,  $^2J_{\text{C-F}} = 3.7$  Hz,  $\text{CF}_3$ ), 125.9 (Ph), 123.0 (q,  $^1J_{\text{C-F}} = 3.8$  Hz,  $\text{CF}_3$ ), 81.4 (O-C), 67.3 (NCH), 39.2 ( $\text{CH}_2$ ), 27.9 ( $\text{CH}_3$ ); HPLC analysis: Daicel Chiralpak OD-H column, hexane/dioxane = 95/5, 254 nm, flow rate = 0.5 ml/min, retention times: 13.4 min (S), 15.0 min (R).

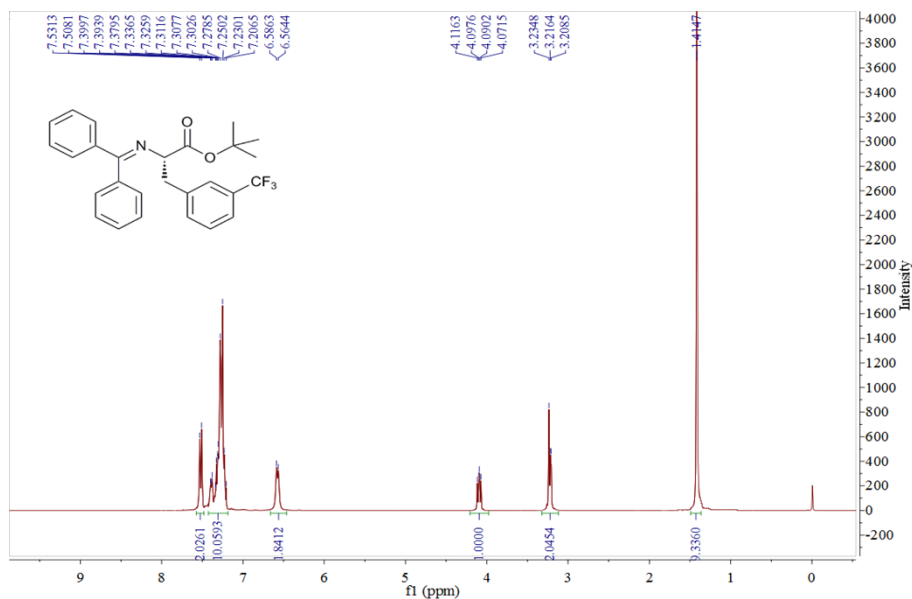

**Fig.11**  $^1\text{H}$  NMR spectra of *tert*-butyl 3-(3-(trifluoromethyl)phenyl)-2-(diphenylmethyleneamino)propanoate

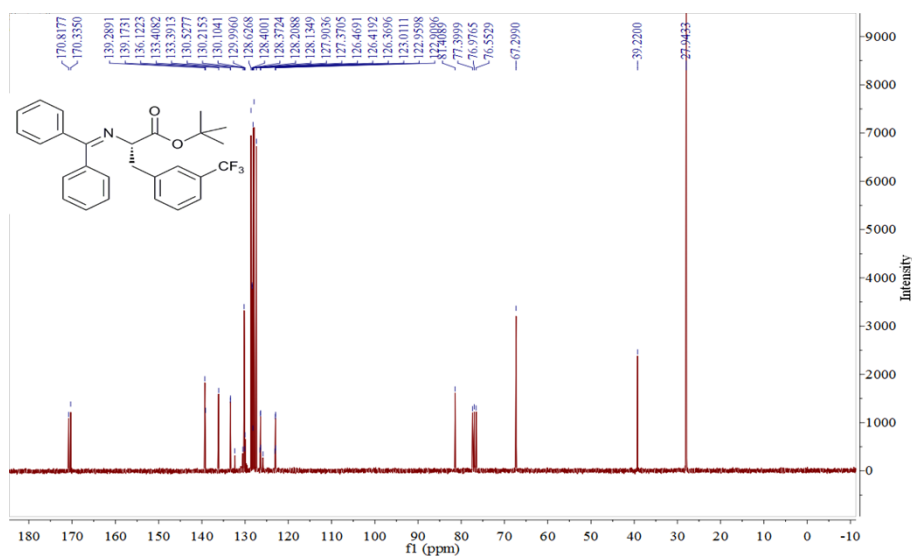

**Fig.12**  $^{13}\text{C}$  NMR spectra of *tert*-butyl 3-(3-(trifluoromethyl)phenyl)-2-(diphenylmethyleneamino)propanoate



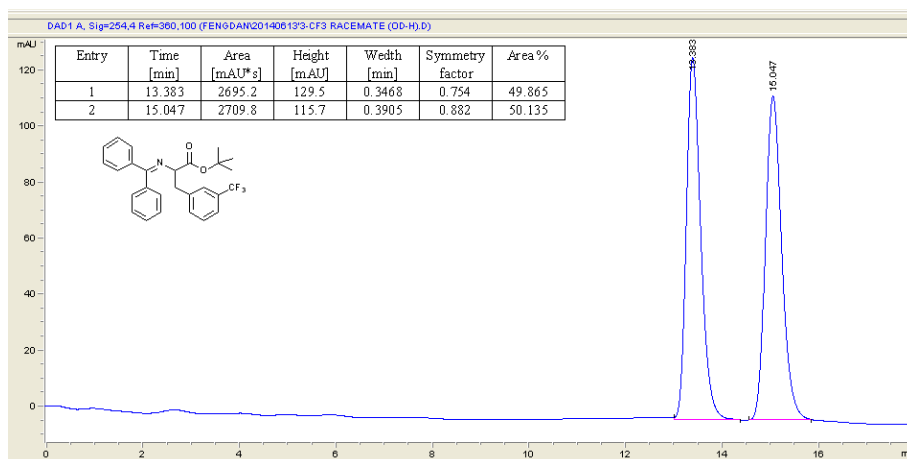

**Fig.13** The HPLC chromatogram of racemic *tert*-butyl 3-(3-(trifluoromethyl)phenyl)-2-(diphenylmethyleneamino)propanoate

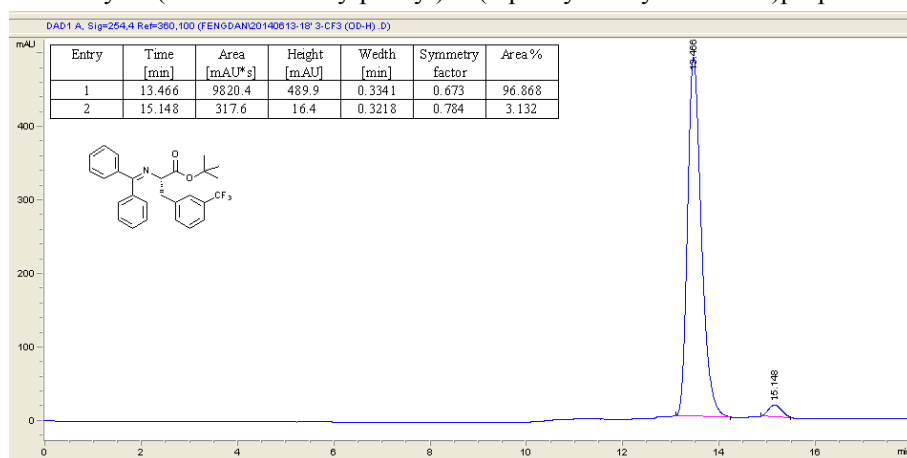

**Fig.14** The HPLC chromatogram of *tert*-butyl 3-(3-(trifluoromethyl)phenyl)-2-(diphenylmethyleneamino)propanoate catalyzed by SiO<sub>2</sub>@CDPTC

***tert*-Butyl 3-(2-(trifluoromethyl)phenyl)-2-(diphenylmethyleneamino)propanoate (Entry 3 in Table 2).**

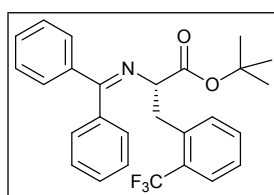

<sup>1</sup>H NMR (300.1 MHz, CDCl<sub>3</sub>, TMS): δ 7.76 (d, <sup>3</sup>J = 7.1 Hz, 1H, Ph-H), 7.57–7.41 (m, 4H, Ph-H), 7.35–7.15 (m, 7H, Ph-H), 6.43 (d, <sup>3</sup>J = 6.4 Hz, 2H, Ph-H), 4.13 (dd, <sup>3</sup>J = 3.5 Hz, 3.5 Hz, 1H, NCH), 3.50–3.22 (m, 2H, CH<sub>2</sub>), 1.39 (s, 9H, CH<sub>3</sub>); <sup>13</sup>C NMR (75.0 MHz, CDCl<sub>3</sub>, TMS): δ 170.7, 170.5 (C=N, C=O), 139.2, 136.8 (q, <sup>2</sup>J<sub>C-F</sub> = 1.6 Hz), 136.0, 133.3, 132.4, 131.1, 130.2, 131.0, 129.6, 128.7, 128.2, 128.1, 127.9, 127.9, 127.3, 126.3, 126.0 (Ph), 125.7 (q, <sup>1</sup>J<sub>C-F</sub> = 5.7 Hz, CF<sub>3</sub>), 81.2 (O-C), 66.5 (NCH), 36.0 (CH<sub>2</sub>), 27.9 (CH<sub>3</sub>); HPLC analysis: Phenomenex Lux 5u Amylose-2, hexane/dioxane = 95/5, 254 nm, flow rate = 0.5 ml/min, retention times: 12.2 min (R), 14.8 min (S).

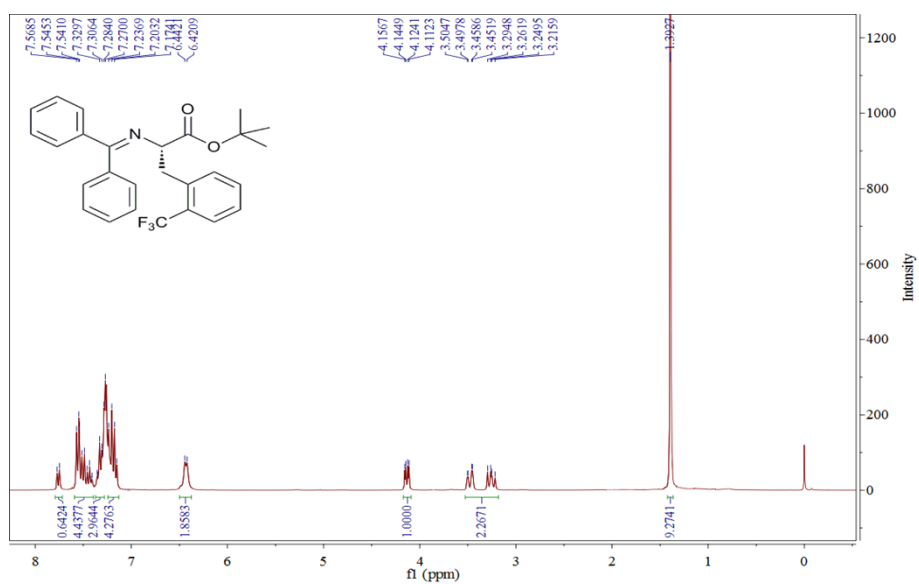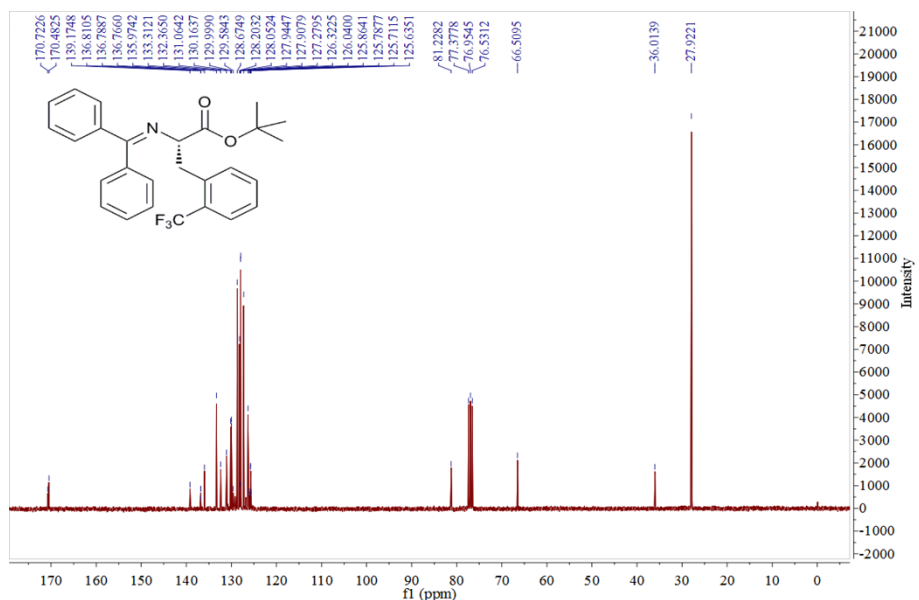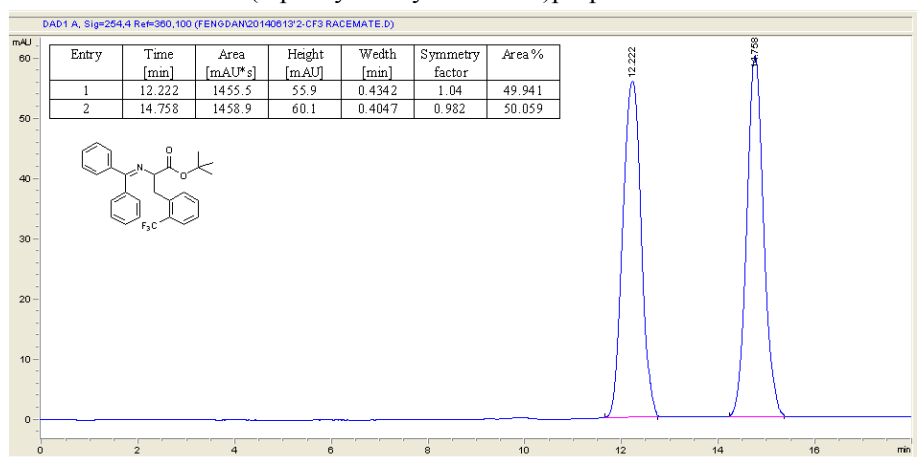

**Fig.17** The HPLC chromatogram of racemic *tert*-butyl 3-(2-trifluoromethylphenyl)-2-(diphenylmethyleneamino)propanoate

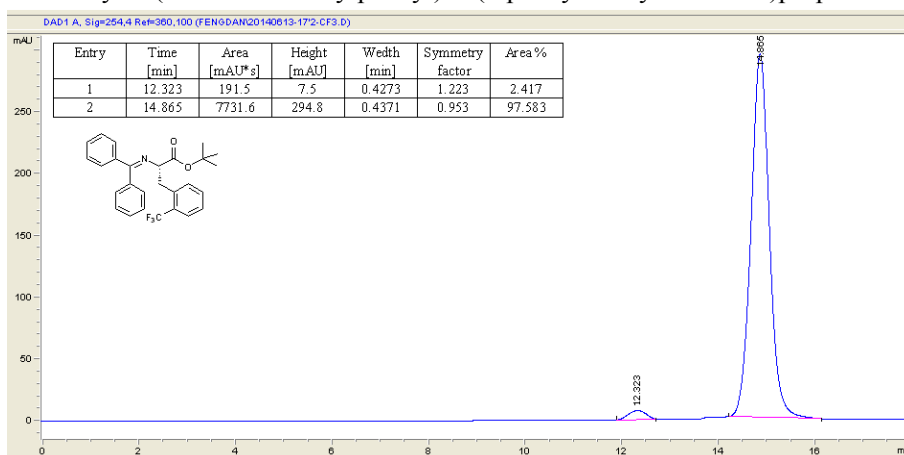

**Fig.18** The HPLC chromatogram of *tert*-butyl 3-(2-trifluoromethylphenyl)-2-(diphenylmethyleneamino)propanoate catalyzed by SiO<sub>2</sub>@CDPTC

***tert*-Butyl 3-(4-fluorophenyl)-2-(diphenylmethyleneamino)propanoate (Entry 4 in Table 2).**

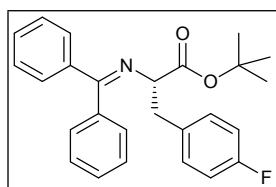

<sup>1</sup>H NMR (300.1 MHz, CDCl<sub>3</sub>, TMS): δ 7.53 (d, <sup>3</sup>J = 6.9 Hz, 2H, Ph-H), 7.35–7.21 (m, 6H, Ph-H), 7.00–6.80 (m, 4H, Ph-H), 6.62 (d, <sup>3</sup>J = 6.5 Hz, 2H, Ph-H), 4.04 (dd, <sup>3</sup>J = 4.6 Hz, 4.7 Hz, 1H, NCH), 3.19–3.05 (m, 2H, CH<sub>2</sub>), 1.40 (s, 9H, CH<sub>3</sub>); <sup>13</sup>C NMR (75.0 MHz, CDCl<sub>3</sub>, TMS): δ 170.6, 170.4 (C=N, C=O), 163.1, 160.0, 139.3, 134.0, 132.4, 131.2 (d, <sup>2</sup>J<sub>C-F</sub> = 7.8 Hz, F), 131.1, 130.9, 130.2, 130.0, 128.6, 128.3, 128.2, 128.1, 128.0, 127.5 (Ph), 114.7, (d, <sup>1</sup>J<sub>C-F</sub> = 20.9 Hz, F), 81.2 (O-C), 67.7 (NCH), 38.7 (CH<sub>2</sub>), 28.0 (CH<sub>3</sub>); HPLC analysis: Phenomenex Lux 5u Amylose-2, hexane/dioxane = 95/5, 254 nm, flow rate = 0.5 ml/min, retention times: 12.7 min (R), 14.7 min (S).

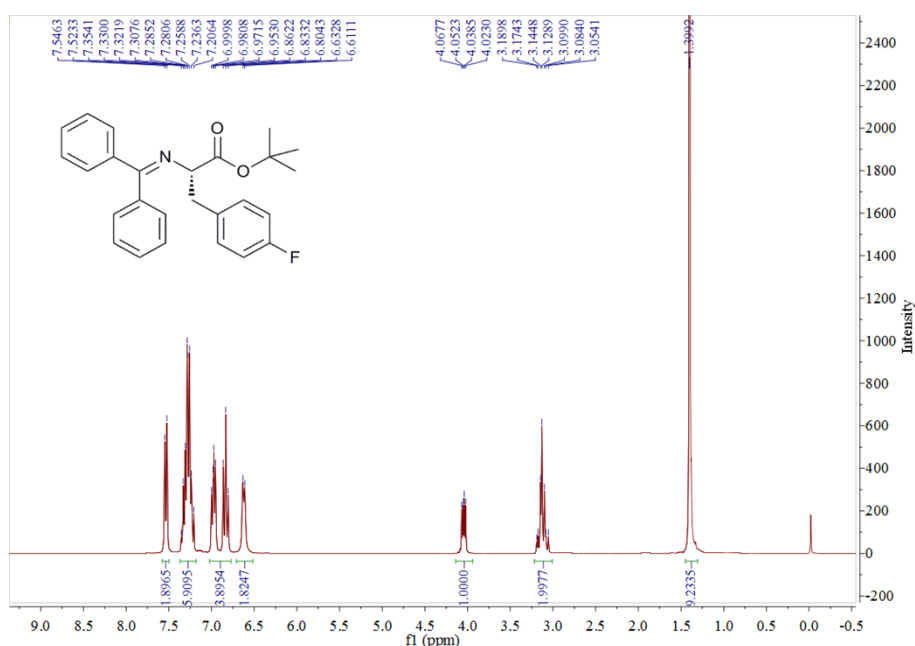

**Fig.19** <sup>1</sup>H NMR spectra of *tert*-butyl 3-(4-fluorophenyl)-2-(diphenylmethyleneamino)propanoate

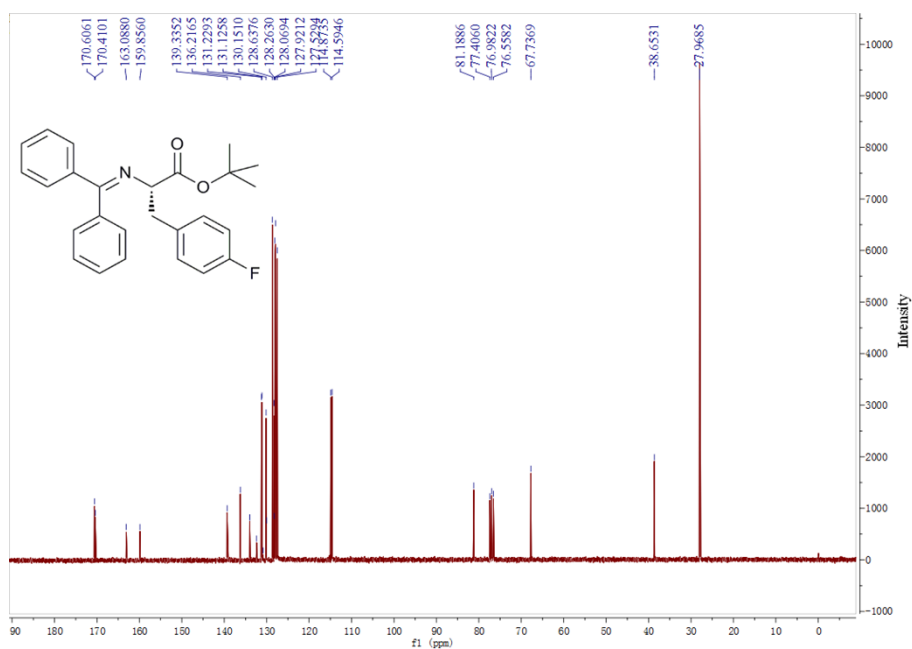

**Fig.20**  $^{13}\text{C}$  NMR spectra of *tert*-butyl 3-(4-fluorophenyl)-2-(diphenylmethyleamino)propanoate

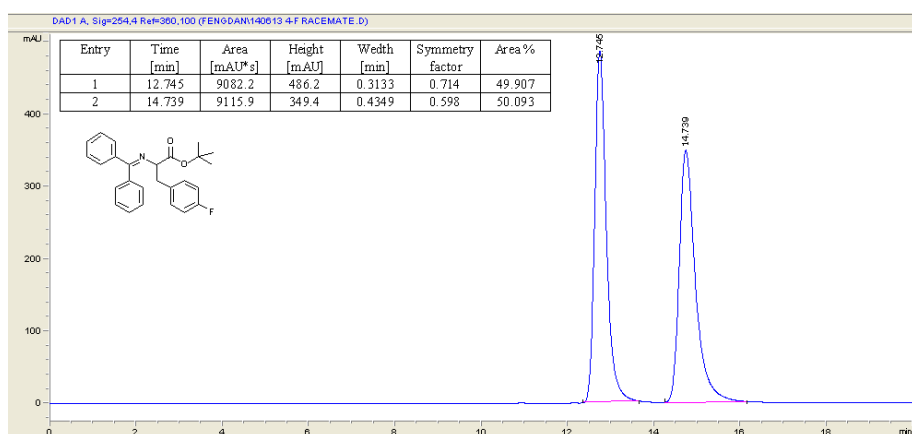

**Fig.21** The HPLC chromatogram of racemic *tert*-butyl 3-(4-fluorophenyl)-2-(diphenylmethyleamino)propanoate

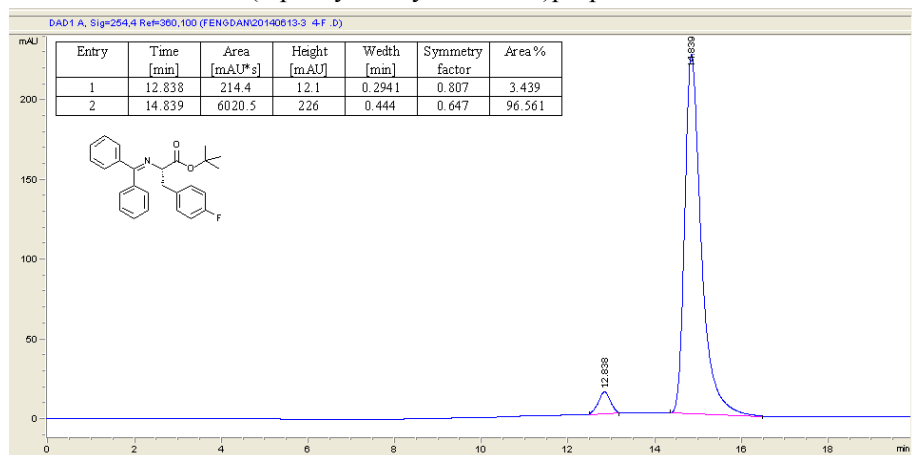

**Fig.22** The HPLC chromatogram of *tert*-butyl 3-(4-fluorophenyl)-2-(diphenylmethyleamino)propanoate catalyzed by  $\text{SiO}_2\text{@CDPTC}$

***tert*-Butyl 3-(3-fluorophenyl)-2-(diphenylmethyleamino)propanoate (Entry 5 in Table 2).**

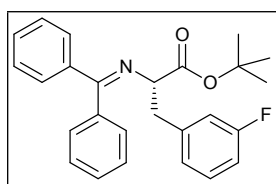

$^1\text{H}$  NMR (300.1 MHz,  $\text{CDCl}_3$ , TMS):  $\delta$  7.49 (d,  $^3J = 6.7$  Hz, 2H, Ph-H), 7.26–7.19 (m, 7H, Ph-H), 7.08 (q,  $^3J = 6.6$  Hz, 1H, Ph-H), 6.79–6.62 (m, 4H, Ph-H), 6.66 (d,  $^3J = 6.6$  Hz, 2H, Ph-H), 4.04 (dd,  $^3J = 3.8$  Hz, 3.8 Hz, 1H, NCH), 3.17–3.04 (m, 2H,  $\text{CH}_2$ ), 1.37 (s, 9H,  $\text{CH}_3$ );  $^{13}\text{C}$  NMR (75.0 MHz,  $\text{CDCl}_3$ , TMS):  $\delta$  170.5, 170.4 (C=N, C=O), 164.2, 160.9, 140.8 (d,  $^3J_{\text{C-F}} = 7.4$  Hz, F), 139.3, 136.2, 132.3, 130.1, 130.0, 128.6, 128.3, 128.2, 128.1, 127.9, 127.5, 125.5, 125.4 (C-Ph), 116.4 (d,  $^2J_{\text{C-F}} = 20.9$  Hz, F), 112.9 (d,  $^1J_{\text{C-F}} = 20.9$  Hz, F), 81.2 (O-C), 67.4 (NCH), 39.2 ( $\text{CH}_2$ ), 27.9 ( $\text{CH}_3$ ); HPLC analysis: Phenomenex Lu5x 5u Amylose-2, hexane/dioxane = 95/5, 254 nm, flow rate = 0.5 ml/min, retention times: 12.7 min (R), 14.8 min (S).

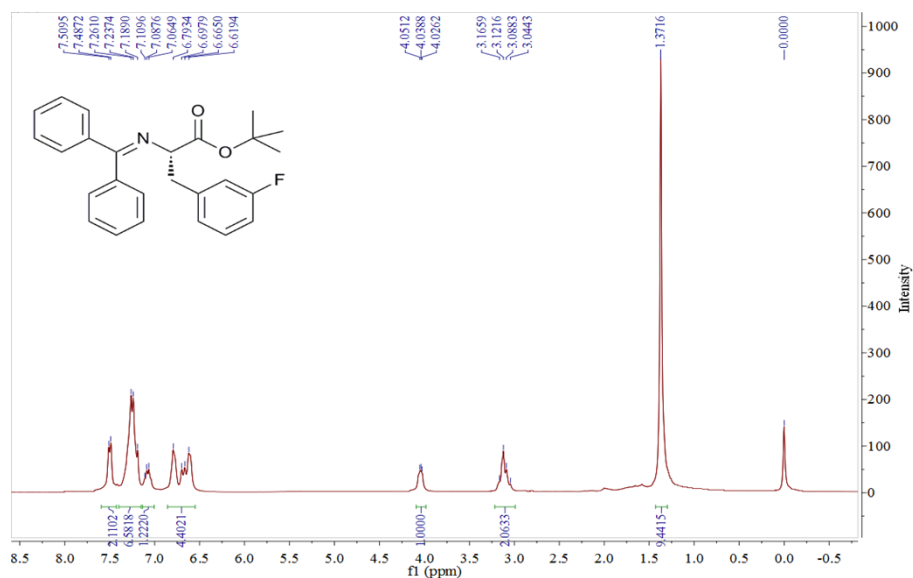

**Fig.23**  $^1\text{H}$  NMR spectra of *tert*-butyl 3-(3-fluorophenyl)-2-(diphenylmethyleamino)propanoate

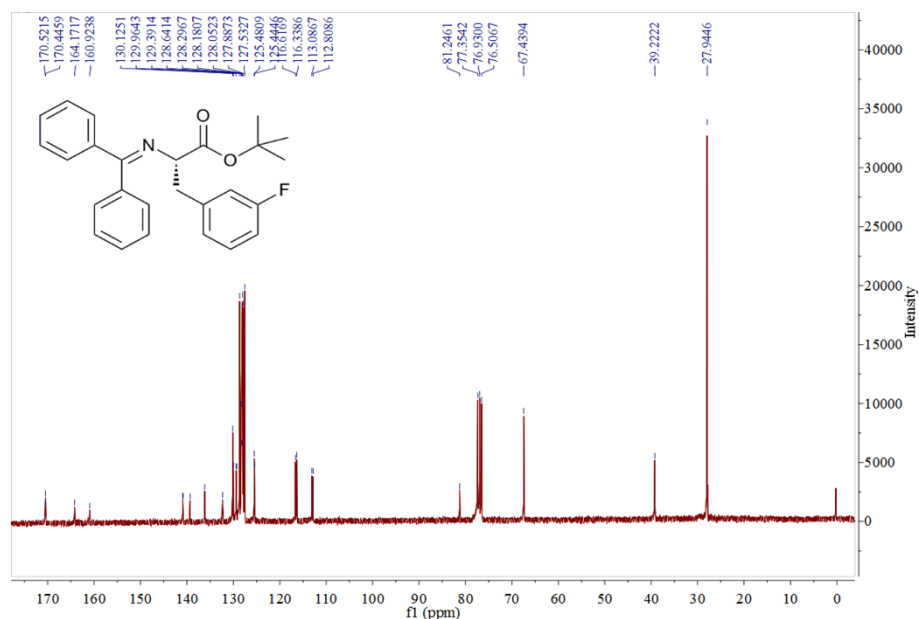

**Fig.24**  $^{13}\text{C}$  NMR spectra of *tert*-butyl 3-(3-fluorophenyl)-2-(diphenylmethyleamino)propanoate

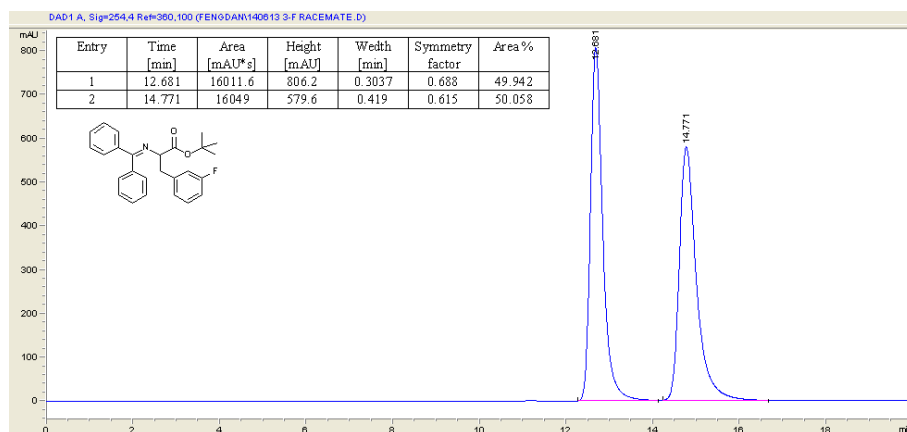

**Fig.25** The HPLC chromatogram of racemic *tert*-butyl 3-(3-fluorophenyl)-2-(diphenylmethyleamino)propanoate

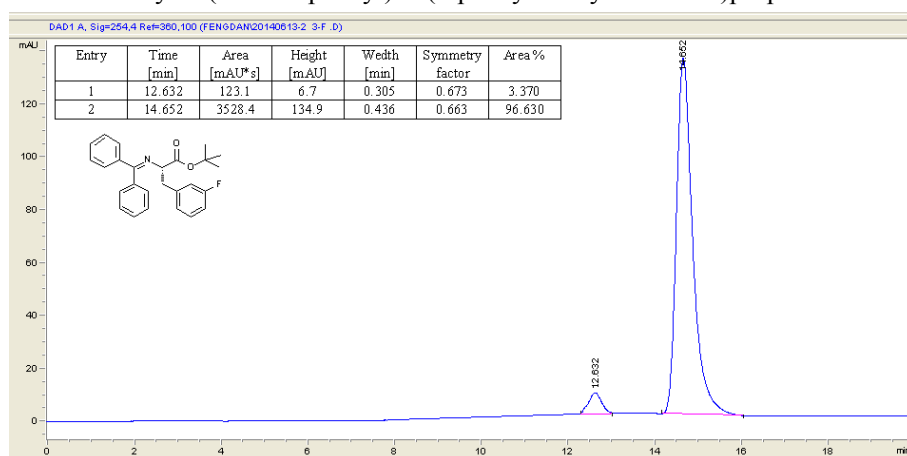

**Fig.26** The HPLC chromatogram of *tert*-butyl 3-(3-fluorophenyl)-2-(diphenylmethyleamino)propanoate catalyzed by SiO<sub>2</sub>@CDPTC

***tert*-Butyl 3-(2-fluorophenyl)-2-(diphenylmethyleamino)propanoate (Entry 6 in Table 2).**

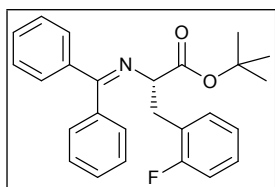

<sup>1</sup>H NMR (300.1 MHz, CDCl<sub>3</sub>, TMS): δ 7.56 (d, <sup>3</sup>J = 7.1 Hz, 2H, Ph-H), 7.37–7.25 (m, 6H, Ph-H), 7.16–7.11 (m, 2H, Ph-H), 6.98–6.87 (m, 2H, Ph-H), 6.66 (d, <sup>3</sup>J = 6.6 Hz, 2H, Ph-H), 4.19 (dd, <sup>3</sup>J = 4.4 Hz, 4.4 Hz, 1H, NCH), 3.36–3.12 (m, 2H, CH<sub>2</sub>), 1.44 (s, 9H, CH<sub>3</sub>); <sup>13</sup>C NMR (75.0 MHz, CDCl<sub>3</sub>, TMS): δ 170.6, 170.5 (C=N, C=O), 162.9, 159.7, 139.4, 136.1, 132.3, 130.1, 130.0, 128.7, 128.2, 128.2, 128.0, 128.0, 127.9, 127.9, 127.6 (C-Ph), 125.2 (d, <sup>3</sup>J<sub>C-F</sub> = 15.5 Hz, F), 123.5 (d, <sup>2</sup>J<sub>C-F</sub> = 3.5 Hz, F), 114.9 (d, <sup>1</sup>J<sub>C-F</sub> = 21.9 Hz, F), 81.2 (O-C), 66.0 (NCH), 32.6 (CH<sub>2</sub>), 27.9 (CH<sub>3</sub>); HPLC analysis: Phenomenex Lux 5u Amylose-2, hexane/dioxane = 95/5, 254 nm, flow rate = 0.5 ml/min, retention times: 13.2 min (R), 15.6 min (S).

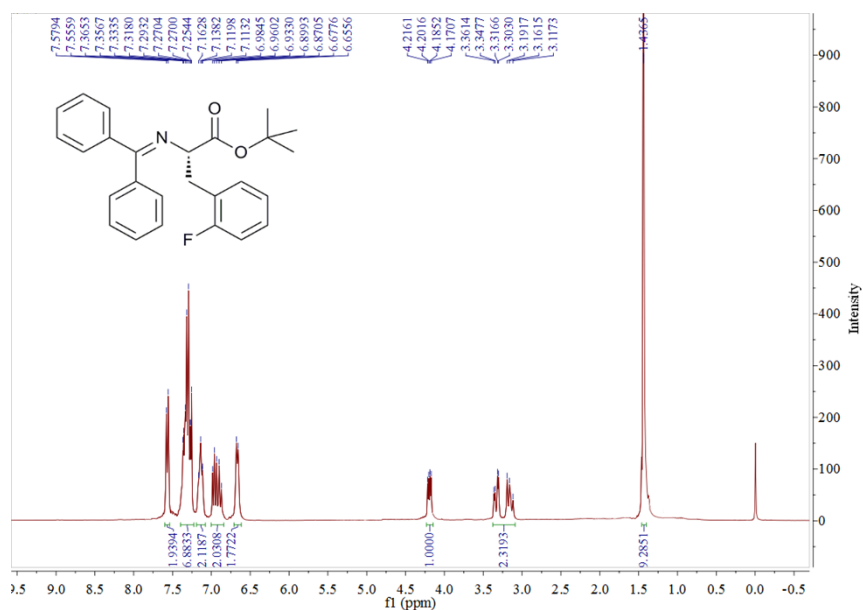

Fig.27  $^1\text{H}$  NMR spectra of *tert*-butyl 3-(2-fluorophenyl)-2-(diphenylmethyleneamino)propanoate

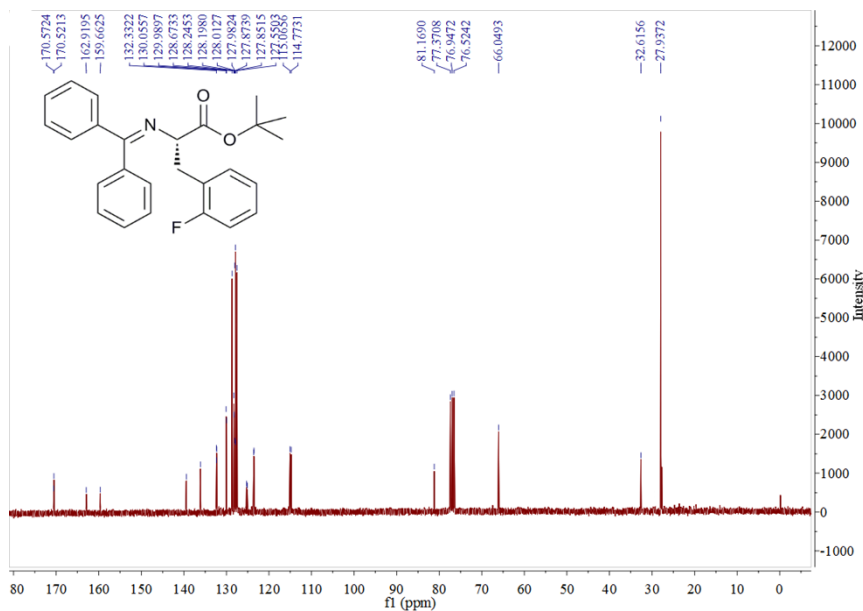

Fig.28  $^{13}\text{C}$  NMR spectra of *tert*-butyl 3-(2-fluorophenyl)-2-(diphenylmethyleneamino)propanoate

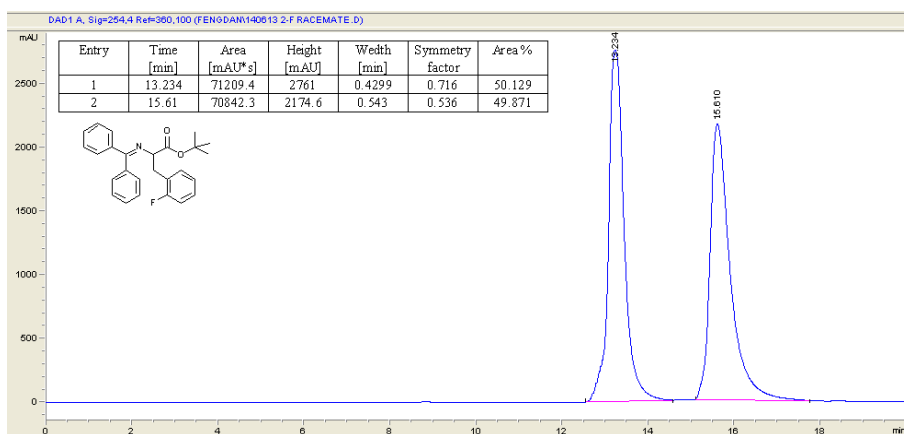

Fig.29 The HPLC chromatogram of racemic

*tert*-butyl 3-(2-fluorophenyl)-2-(diphenylmethyleneamino)propanoate

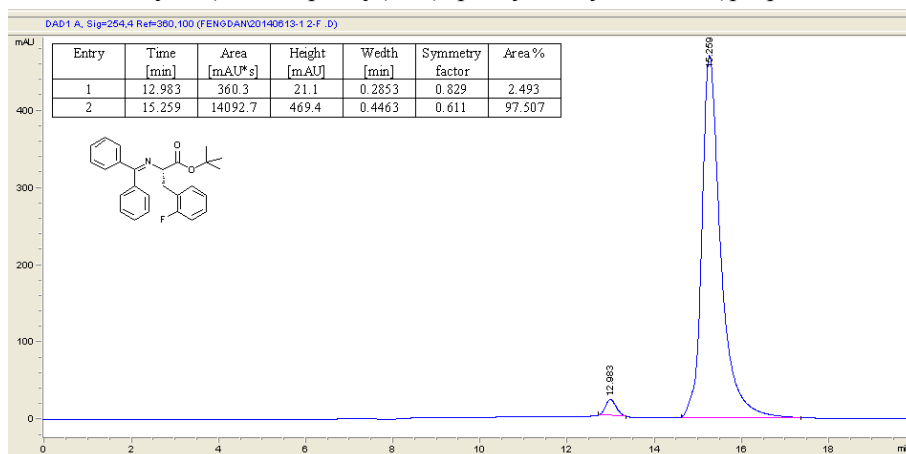

**Fig.30** The HPLC chromatogram of *tert*-butyl 3-(2-fluorophenyl)-2-(diphenylmethyleneamino)propanoate catalyzed by SiO<sub>2</sub>@CDPTC

*tert*-Butyl 3-(4-methylphenyl)-2-(diphenylmethyleneamino)propanoate (Entry 7 in Table 2).

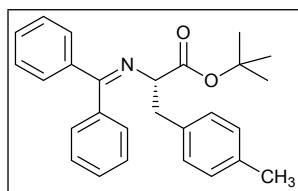

<sup>1</sup>H NMR (300.1 MHz, CDCl<sub>3</sub>, TMS): δ 7.81 (d, <sup>3</sup>J = 7.2 Hz, 1H, Ph-H), 7.58 (d, <sup>3</sup>J = 7.1 Hz, 2H, Ph-H), 7.39–7.25 (m, 6H, Ph-H), 6.96 (q, <sup>3</sup>J = 7.9 Hz, 4H, Ph-H), 6.62 (d, <sup>3</sup>J = 6.6 Hz, 2H, Ph-H), 4.09 (dd, <sup>3</sup>J = 4.4 Hz, 4.4 Hz, 1H, NCH), 3.23–3.07 (m, 2H, CH<sub>2</sub>), 2.28 (s, 3H, Ph-CH<sub>3</sub>), 1.44 (s, 9H, CH<sub>3</sub>); <sup>13</sup>C NMR (75.0 MHz, CDCl<sub>3</sub>, TMS): δ 170.9, 170.1 (C=N, C=O), 139.5, 137.5, 136.3, 135.5, 135.1, 132.4, 130.0, 129.6, 128.7, 128.2, 128.1, 128.0, 127.9, 127.6 (C-Ph), 81.0 (O-C), 68.0 (N-CH), 39.1 (CH<sub>2</sub>), 28.0 (CH<sub>3</sub>), 21.0 (Ph-CH<sub>3</sub>); HPLC analysis: Phenomenex Lux 5u Amylose-2, hexane/dioxane = 95/5, 254 nm, flow rate = 0.5 ml/min, retention times: 13.0 min (R), 15.4 min (S).

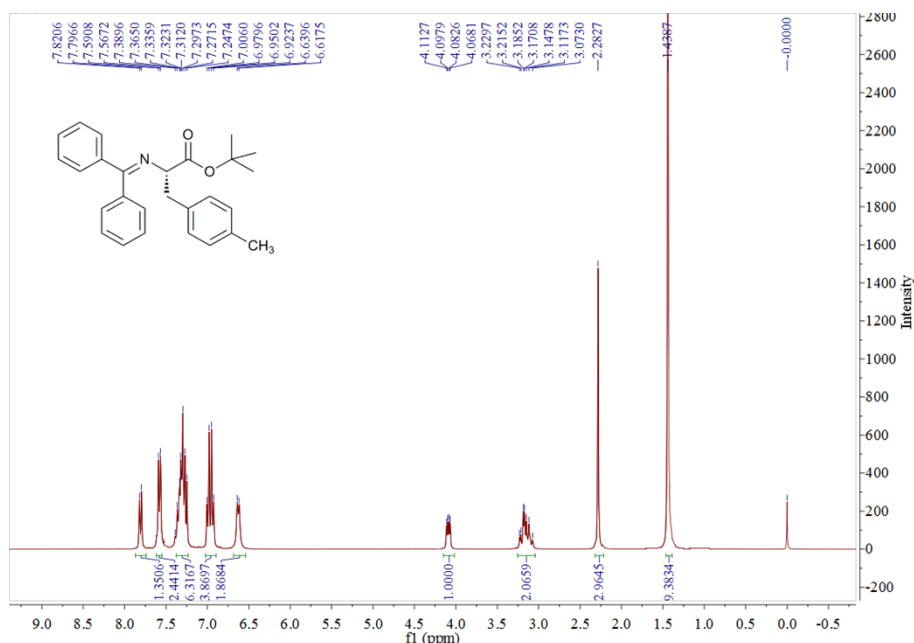

**Fig.31** <sup>1</sup>H NMR spectra of *tert*-butyl 3-(4-methylphenyl)-2-(diphenylmethyleneamino)propanoate



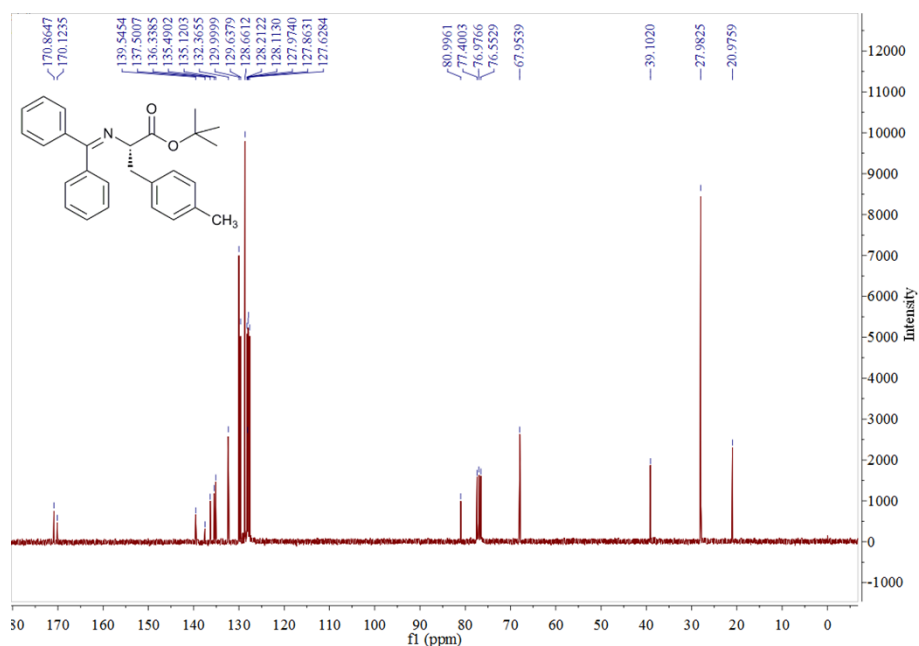

**Fig.32**  $^{13}\text{C}$  NMR spectra of *tert*-butyl 3-(4-methylphenyl)-2-(diphenylmethyleneamino)propanoate

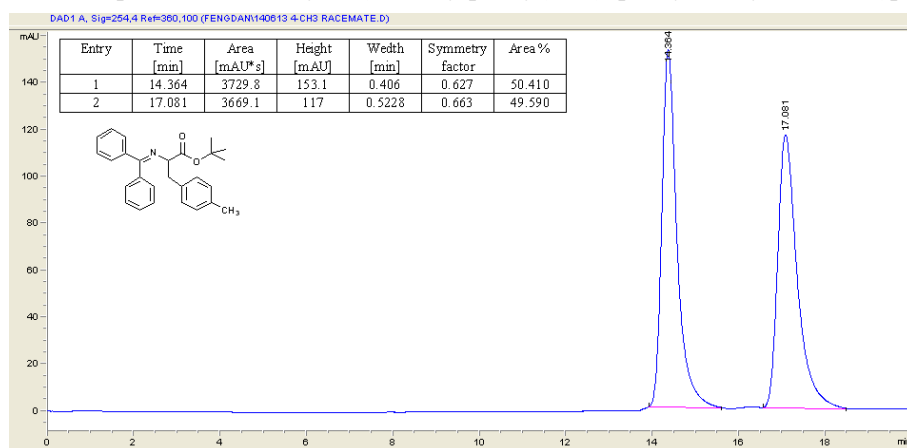

**Fig.33** The HPLC chromatogram of racemic *tert*-butyl 3-(4-methylphenyl)-2-(diphenylmethyleneamino)propanoate

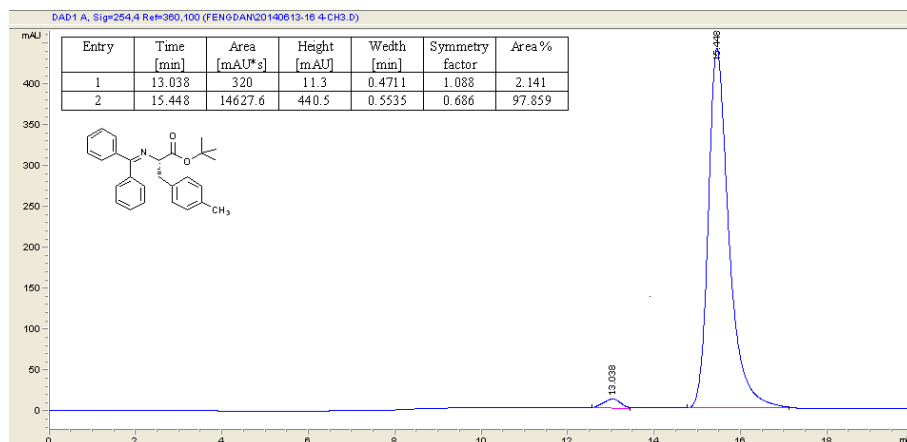

**Fig.34** The HPLC chromatogram of *tert*-butyl 3-(4-methylphenyl)-2-(diphenylmethyleneamino)propanoate catalyzed by  $\text{SiO}_2@\text{CDPTC}$

*tert*-Butyl 3-(3-methylphenyl)-2-(diphenylmethyleneamino)propanoate (Entry 8 in Table 2).

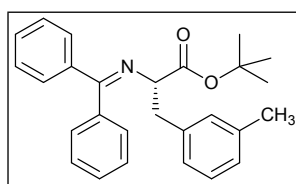

$^1\text{H}$  NMR (300.1 MHz,  $\text{CDCl}_3$ , TMS):  $\delta$  7.81 (d,  $^3J = 7.2$  Hz, 1H, Ph-H), 7.62–7.46 (m, 4H, Ph-H), 7.38–7.26 (m, 7H, Ph-H), 6.59 (d,  $^3J = 6.5$  Hz, 2H, Ph-H), 4.09 (dd,  $^3J = 4.5$  Hz, 4.3 Hz, 1H, NCH), 3.23–3.08 (m, 2H,  $\text{CH}_2$ ), 2.22 (s, 3H, Ph- $\text{CH}_3$ ), 1.45 (s, 9H,  $\text{CH}_3$ );  $^{13}\text{C}$  NMR (75.0 MHz,  $\text{CDCl}_3$ , TMS):  $\delta$  170.8, 170.2 (C=N, C=O), 139.5, 138.1, 137.4, 136.3, 132.4, 132.3, 130.6, 130.0, 130.0, 128.6, 128.2, 128.2, 128.1, 127.9, 127.8, 127.7, 126.8, 126.7 (C-Ph), 81.0 (O-C), 67.8 (NCH), 39.4 ( $\text{CH}_2$ ), 28.0 ( $\text{CH}_3$ ), 21.1 (Ph- $\text{CH}_3$ ); HPLC analysis: Phenomenex Lux 5u Amylose-2, hexane/dioxane = 95/5, 254 nm, flow rate = 0.5 ml/min, retention times: 14.0 min (R), 16.3 min (S).

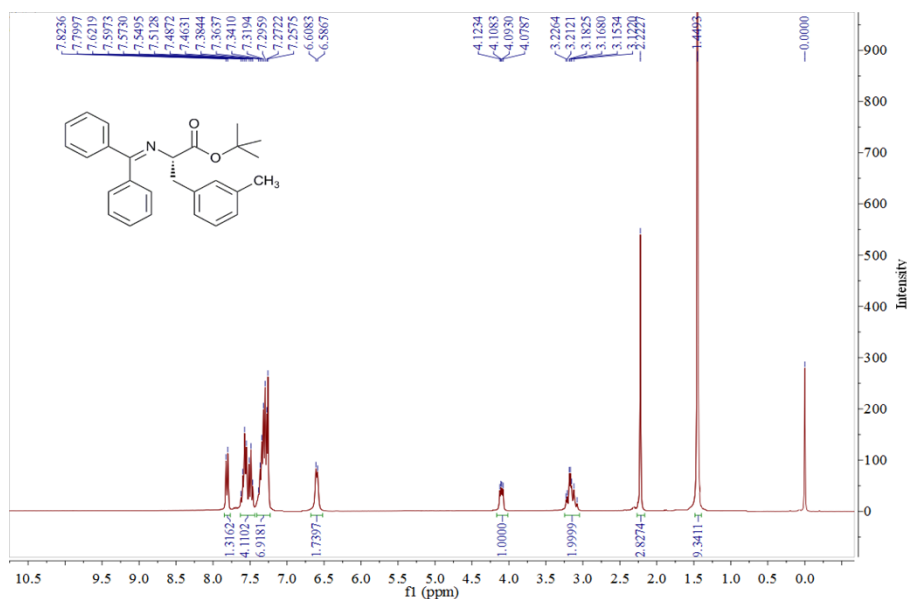

**Fig.35**  $^1\text{H}$  NMR spectra of *tert*-butyl 3-(3-methylphenyl)-2-(diphenylmethyleneamino)propanoate

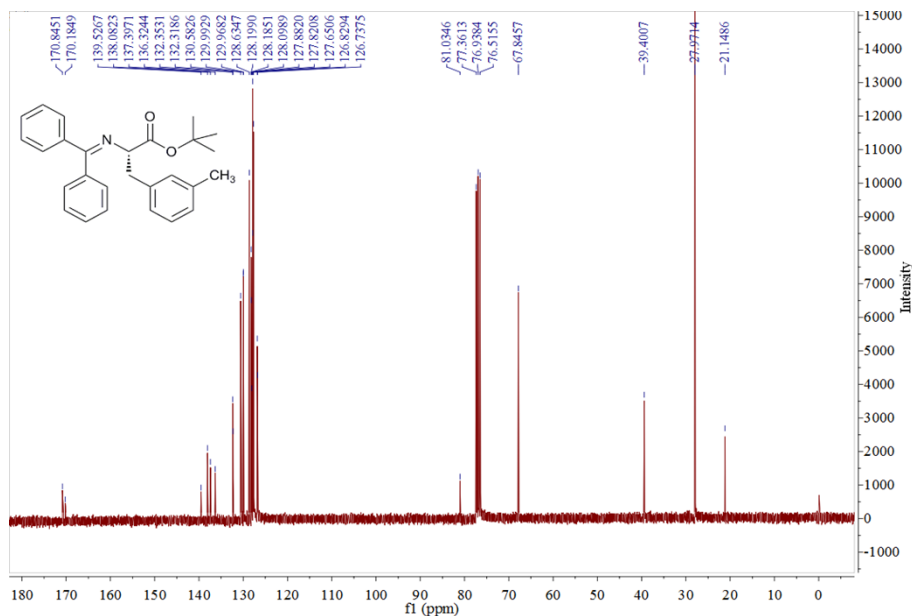

**Fig.36**  $^{13}\text{C}$  NMR spectra of *tert*-butyl 3-(3-methylphenyl)-2-(diphenylmethyleneamino)propanoate

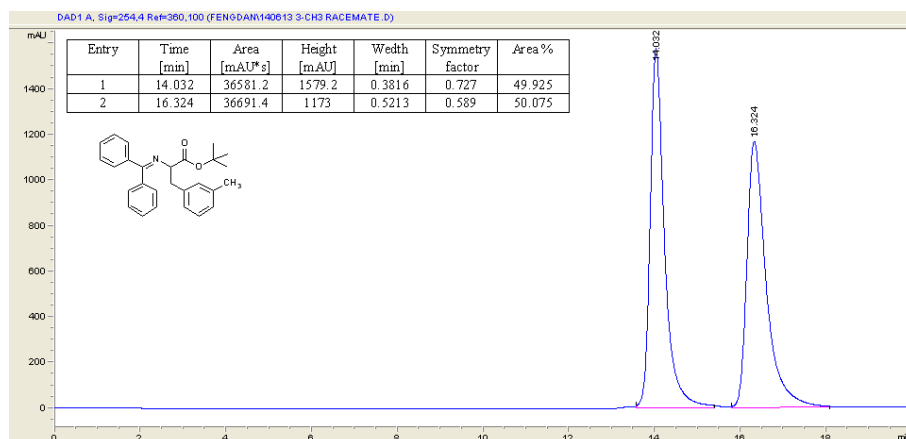

**Fig.37** The HPLC chromatogram of racemic *tert*-butyl 3-(3-methylphenyl)-2-(diphenylmethyleneamino)propanoate

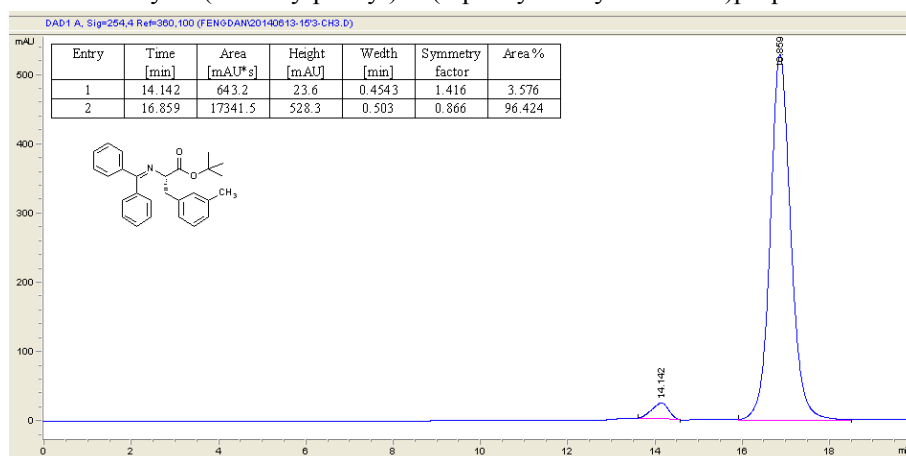

**Fig.38** The HPLC chromatogram of *tert*-butyl 3-(3-methylphenyl)-2-(diphenylmethyleneamino)propanoate catalyzed by  $\text{SiO}_2\text{@CDPTC}$

***tert*-Butyl 3-(2-methylphenyl)-2-(diphenylmethyleneamino)propanoate (Entry 9 in Table 2).**

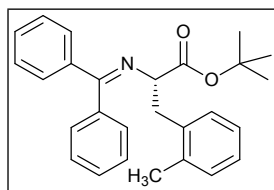

$^1\text{H}$  NMR (300.1 MHz,  $\text{CDCl}_3$ , TMS):  $\delta$  7.60 (d,  $^3J = 7.2$  Hz, 2H, Ph-H), 7.35–7.23 (m, 6H, Ph-H), 7.09–7.04 (m, 4H, Ph-H), 6.52 (d,  $^3J = 4.1$  Hz, 2H, Ph-H), 4.15 (dd,  $^3J = 3.9$  Hz, 3.9 Hz, 1H, NCH), 3.33–3.15 (m, 2H,  $\text{CH}_2$ ), 2.06 (s, 3H, Ph- $\text{CH}_3$ ), 1.39 (s, 9H,  $\text{CH}_3$ );  $^{13}\text{C}$  NMR (75.0 MHz,  $\text{CDCl}_3$ , TMS):  $\delta$  171.0, 170.1 (C=N, C=O), 139.3, 136.9, 136.3, 136.2, 132.4, 131.0, 130.0, 130.0, 129.9, 128.7, 128.2, 128.1, 127.9, 127.8, 127.6, 126.3, 125.9, 125.5 (Ph-C), 81.0 (O-C), 66.4 (NCH), 36.7 ( $\text{CH}_2$ ), 28.0 ( $\text{CH}_3$ ), 19.2 (Ph- $\text{CH}_3$ ); HPLC analysis: Phenomenex Lux 5u Amylose-2, hexane/dioxane = 95/5, 254 nm, flow rate = 0.5 ml/min, retention times: 12.3 min (R), 14.6 min (S).

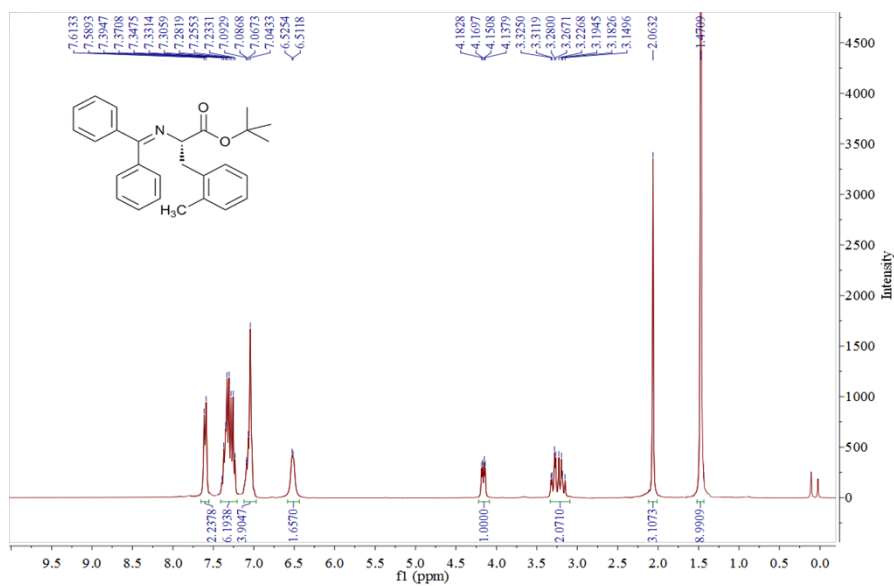

**Fig.39**  $^1\text{H}$  NMR spectra of *tert*-butyl 3-(2-methylphenyl)-2-(diphenylmethyleneamino)propanoate

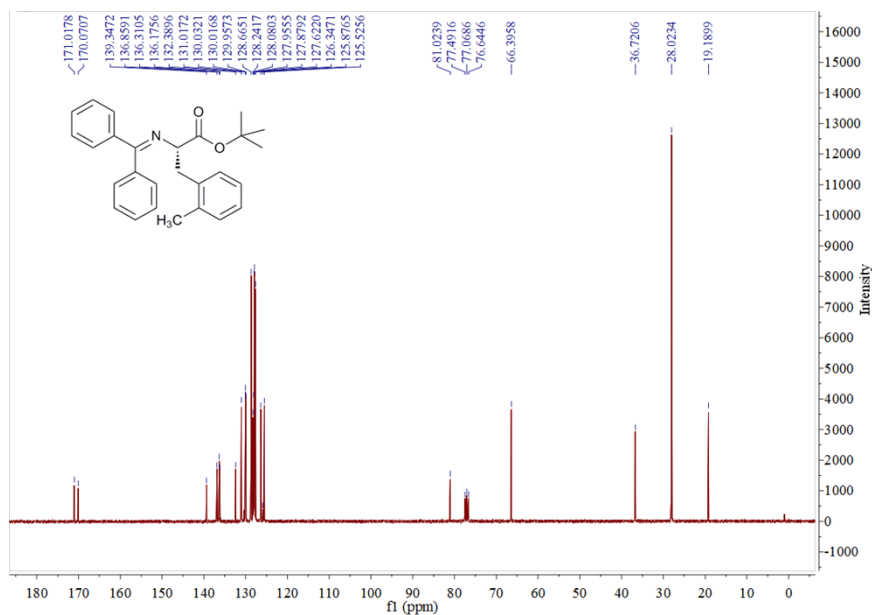

**Fig.40**  $^{13}\text{C}$  NMR spectra of *tert*-butyl 3-(2-methylphenyl)-2-(diphenylmethyleneamino)propanoate

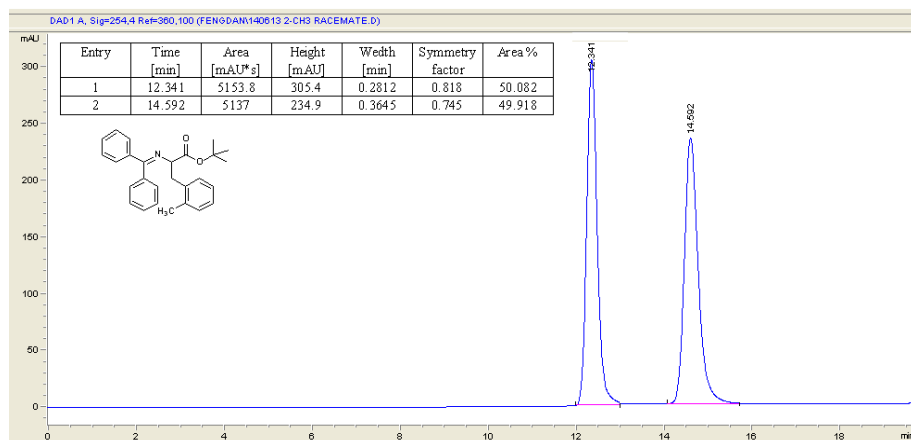

**Fig.41** The HPLC chromatogram of racemic *tert*-butyl 3-(2-methylphenyl)-2-(diphenylmethyleneamino)propanoate

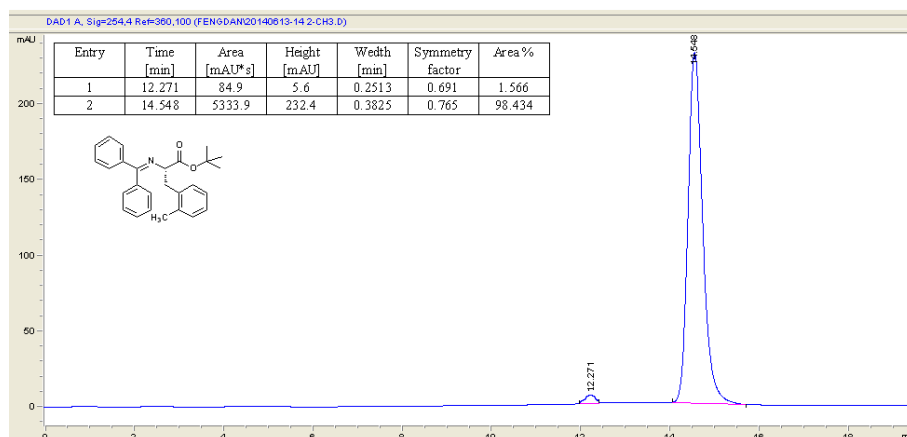

**Fig.42** The HPLC chromatogram of *tert*-butyl 3-(2-methylphenyl)-2-(diphenylmethyleamino)propanoate catalyzed by SiO<sub>2</sub>@CDPTC

**tert-Butyl 3-(2-naphthyl)-2-(diphenylmethyleamino)propanoate (Entry 10 in Table 2).**

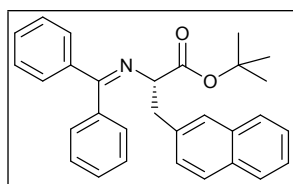

<sup>1</sup>H NMR (600.1 MHz, CDCl<sub>3</sub>, TMS): δ 7.78 (d, <sup>3</sup>J = 7.6 Hz, 1H, Ar-H), 7.73 (d, <sup>3</sup>J = 7.2 Hz, 1H, Ar-H), 7.64 (dd, <sup>3</sup>J = 17.6, 12.3 Hz, 2H, Ar-H), 7.54 (t, <sup>3</sup>J = 8.0 Hz, 2H, Ar-H), 7.45 (dd, <sup>3</sup>J = 19.8, 12.2 Hz, 2H, Ar-H), 7.40 – 7.35 (m, 2H, Ar-H), 7.32 (dd, <sup>3</sup>J = 15.5, 8.1 Hz, 1H, Ar-H), 7.22 – 7.11 (m, 4H, Ar-H), 6.52 (s, 2H, Ar-H), 4.22 (dd, <sup>3</sup>J = 9.2, 4.2 Hz, 1H, NCH), 3.34 (ddd, <sup>3</sup>J = 22.7, 13.5, 6.8 Hz, 2H, CH<sub>2</sub>), 1.42 (s, 9H, CH<sub>3</sub>); <sup>13</sup>C NMR (150.9 MHz, CDCl<sub>3</sub>, TMS): δ 170.85, 170.39(C=N, C=O), 139.62, 137.71, 136.37, 135.99, 133.51, 132.38, 132.19, 130.10, 130.05, 128.75, 128.42, 128.29, 128.24, 128.02, 127.94, 127.72, 127.62, 127.56, 127.51, 126.15, 125.77, 125.25, 81.18 (O-C), 67.94 (N-C), 39.83 (CH<sub>2</sub>), 28.11 (CH<sub>3</sub>); HPLC analysis: Phenomenex Lux 5u Amylose-2, hexane/dioxane = 95/5, 254 nm, flow rate = 0.5 ml/min, retention times: 17.3 min (R), 21.1 min (S).

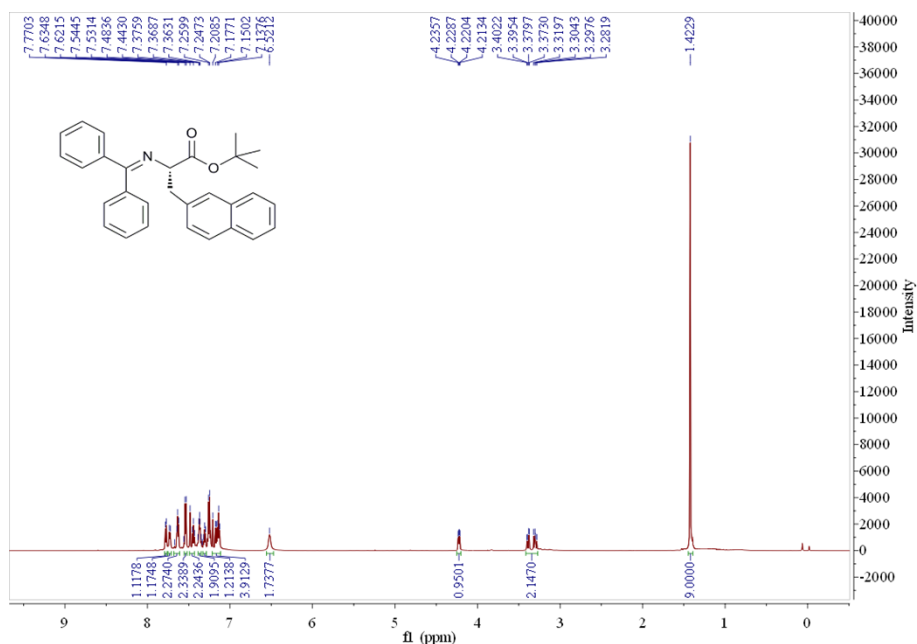

**Fig.43** <sup>1</sup>H NMR spectra of *tert*-butyl 3-(2-naphthyl)-2-(diphenylmethyleamino)propanoate

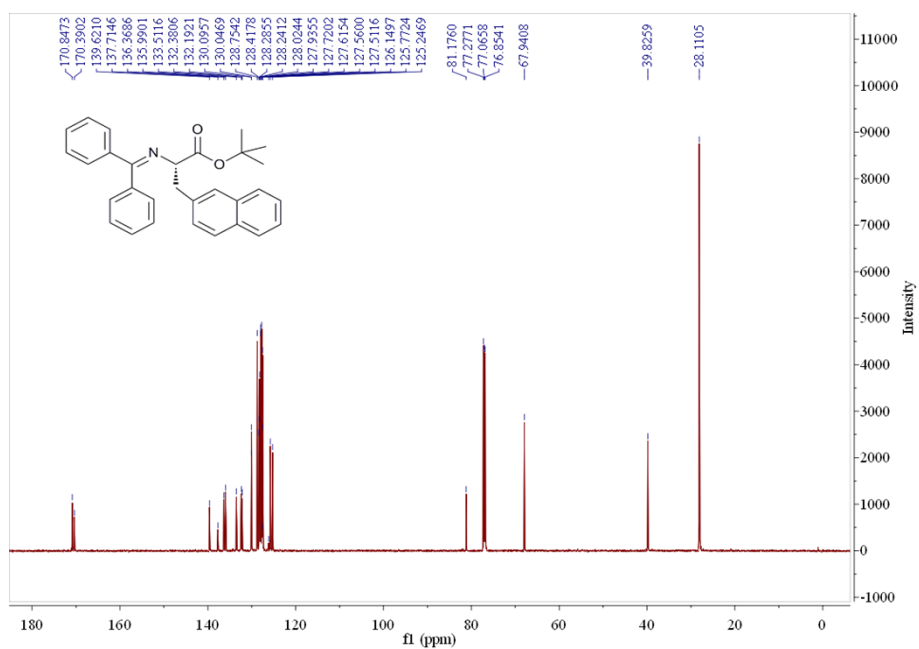

**Fig.44**  $^{13}\text{C}$  NMR spectra of *tert*-butyl 3-(2-naphthyl)-2-(diphenylmethyleneamino)propanoate

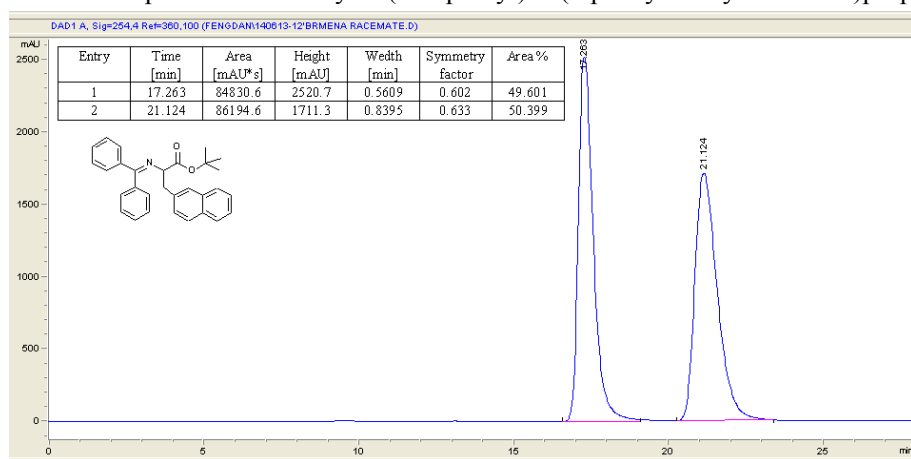

**Fig.45** The HPLC chromatogram of racemic *tert*-butyl 3-(2-naphthyl)-2-(diphenylmethyleneamino)propanoate

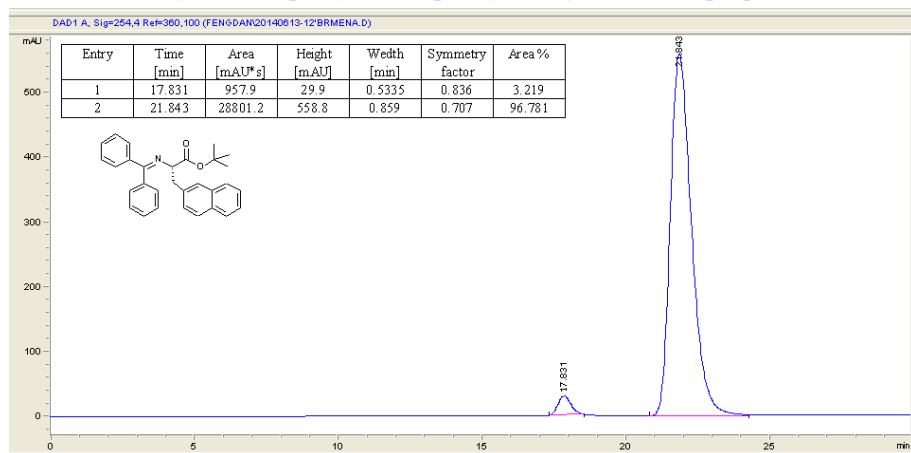

**Fig.46** The HPLC chromatogram of *tert*-butyl 3-(2-naphthyl)-2-(diphenylmethyleneamino)propanoate catalyzed by  $\text{SiO}_2@\text{CDPTC}$

***tert*-Butyl 3-vinyl-2-(diphenylmethyleneamino)propanoate (Entry 11 in Table 2).**

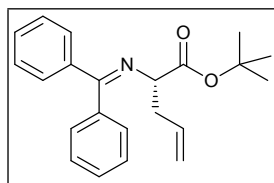

$^1\text{H}$  NMR (600.1 MHz,  $\text{CDCl}_3$ , TMS):  $\delta$  7.72 – 7.68 (m, 2H, Ph-H), 7.56 (d,  $^3J = 7.3$  Hz, 1H, Ph-H), 7.46 (t,  $^3J = 7.4$  Hz, 1H, Ph-H), 7.36 (t,  $^3J = 7.8$  Hz, 2H, Ph-H), 7.32 (dd,  $^3J = 8.8, 6.2$  Hz, 1H, Ph-H), 7.20 (dt,  $^3J = 5.2, 3.8$  Hz, 2H, Ph-H), 7.08 (dd,  $^3J = 7.5, 1.6$  Hz, 1H, Ph-H), 5.64 (ddt,  $^3J = 17.2, 10.2, 7.1$  Hz, 1H, -CH=), 4.95 (ddd,  $^3J = 13.6, 11.2, 1.1$  Hz, 2H, =CH<sub>2</sub>), 3.93 (dd,  $^3J = 7.6, 5.3$  Hz, 1H, NCH), 2.62 – 2.50 (m, 2H, CH<sub>2</sub>), 1.35 (s, 9H, CH<sub>3</sub>);  $^{13}\text{C}$  NMR (150.9 MHz,  $\text{CDCl}_3$ , TMS): 170.85, 170.08 (C=O, C=N), 139.79, 137.70, 136.72, 134.78, 132.38, 130.02, 128.84, 128.54, 128.41, 128.29, 127.99, 127.98, 117.22, 80.97(O-C), 65.92 (N-CH), 38.17 (CH<sub>2</sub>), 28.12 (CH<sub>3</sub>); HPLC analysis: Phenomenex Lux 5u Amylose-2, hexane/dioxane = 95/5, 254 nm, flow rate = 0.5 ml/min, retention times: 12.1 min (R), 13.6 min (S).

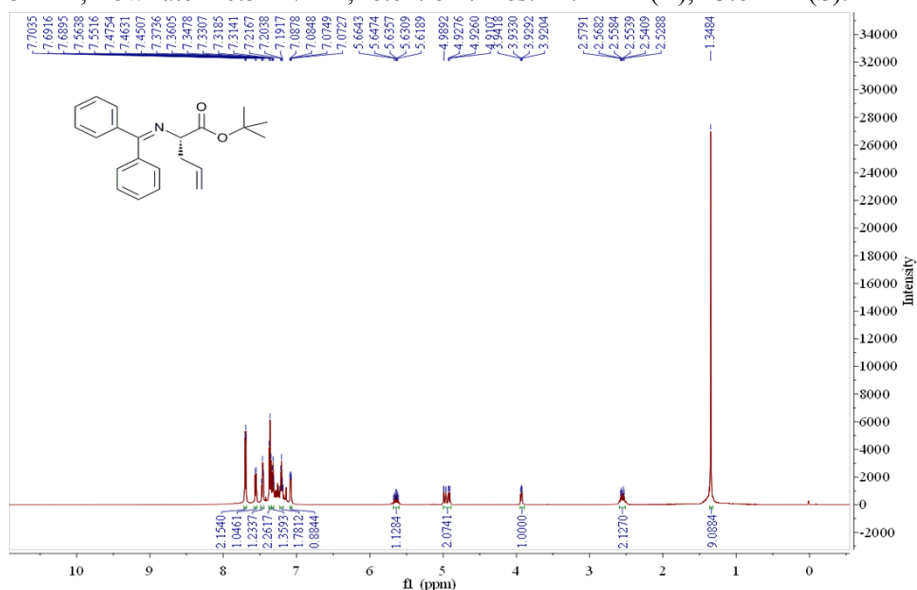

**Fig.47**  $^1\text{H}$  NMR spectra of *tert*-butyl 3-vinyl-2-(diphenylmethyleneamino)propanoate

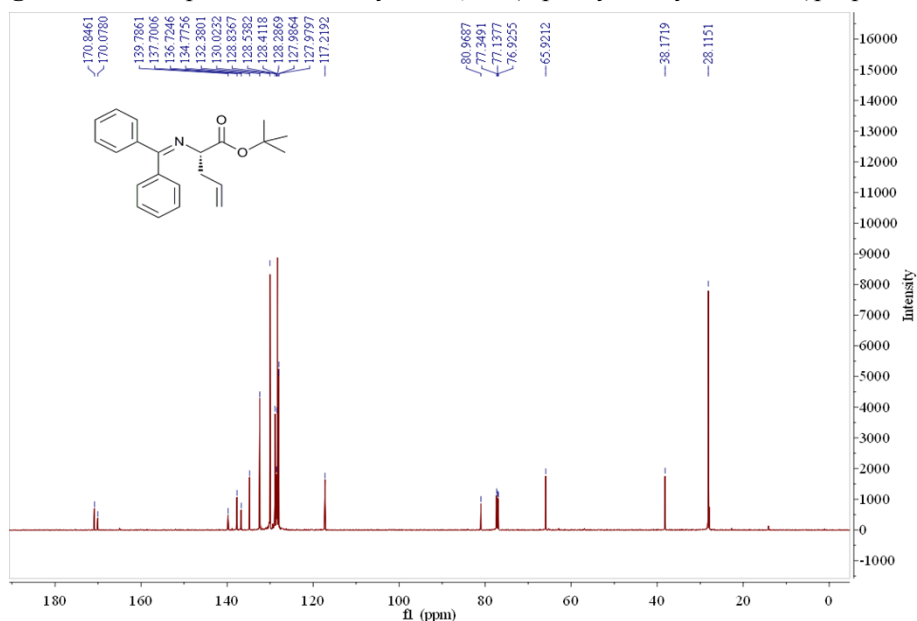

**Fig.48**  $^{13}\text{C}$  NMR spectra of *tert*-butyl 3-vinyl-2-(diphenylmethyleneamino)propanoate

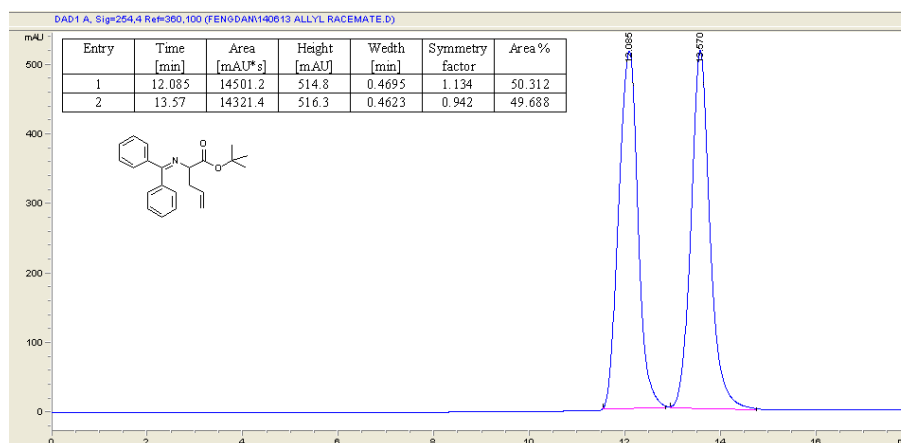

**Fig.49** The HPLC chromatogram of racemic *tert*-butyl 3-vinyl-2-(diphenylmethyleamino)propanoate

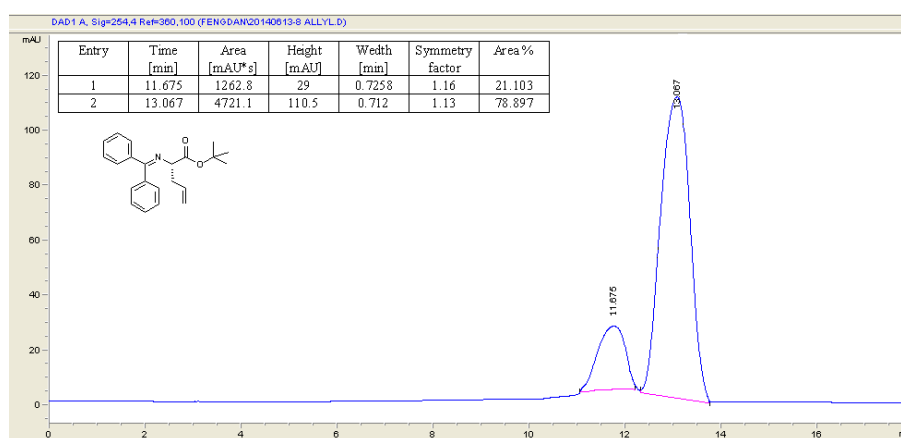

**Fig.50** The HPLC chromatogram of *tert*-butyl 3-vinyl-2-(diphenylmethyleamino)propanoate catalyzed by  $\text{SiO}_2\text{@CDPTC}$

***tert*-Butyl 3-(1-methylvinyl)-2-(diphenylmethyleamino)propanoate (Entry 12 in Table 2).**

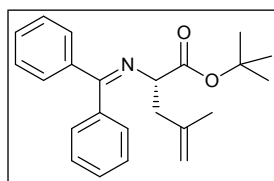

$^1\text{H}$  NMR (600.1 MHz,  $\text{CDCl}_3$ , TMS):  $\delta$  7.66 (dd,  $^3J = 26.3, 7.8$  Hz, 2H, Ph-H), 7.49 – 7.41 (m, 3H, Ph-H), 7.38 – 7.34 (m, 1H, Ph-H), 7.30 (t,  $^3J = 7.4$  Hz, 2H, Ph-H), 7.19 (t,  $^3J = 14.0$  Hz, 2H, Ph-H), 4.72 (d,  $^3J = 14.0$  Hz, 2H,  $=\text{CH}_2$ ), 4.08 (dd,  $^3J = 7.9, 5.3$  Hz, 1H, NCH), 2.67 – 2.54 (m, 2H,  $\text{CH}_2$ ), 1.52 (s, 3H,  $\text{CH}_3$ ), 1.45 (s, 9H,  $\text{CH}_3$ );  $^{13}\text{C}$  NMR (150.9 MHz,  $\text{CDCl}_3$ , TMS):  $\delta$  171.17, 169.84 (C=N, C=O), 141.92, 139.83, 136.56, 132.36, 130.09, 130.03, 128.83, 128.50, 128.30, 128.11, 127.94, 113.27, 80.98 (O-C), 64.91 (N-CH), 41.90 ( $\text{CH}_2$ ), 28.08 ( $\text{CH}_3$ ), 22.61 ( $\text{CH}_3$ ); HPLC analysis: Phenomenex Lux 5u Amylose-2, hexane/dioxane = 95/5, 254 nm, flow rate = 0.5 ml/min, retention times: 12.2 min (R), 13.8 min (S).



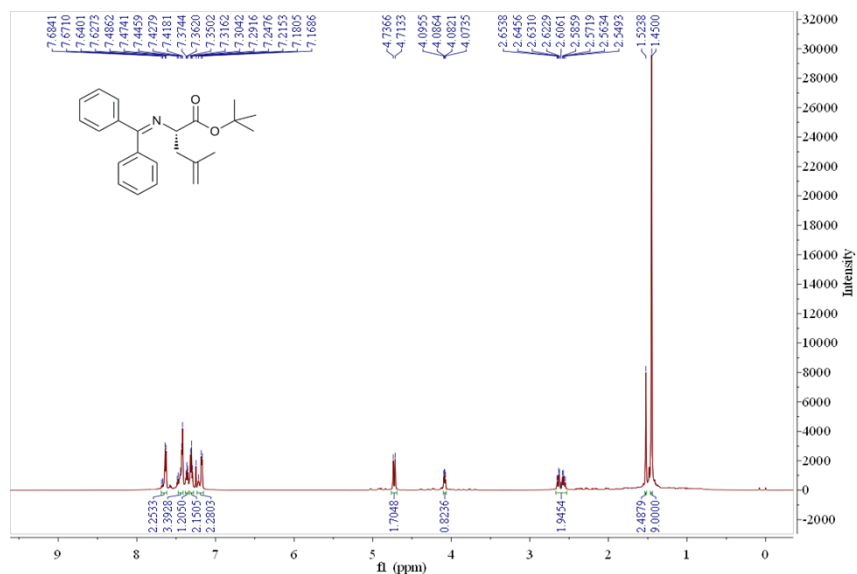

**Fig.51**  $^1\text{H}$  NMR spectra of *tert*-butyl 3-(1-methylvinyl)-2-(diphenylmethyleneamino)propanoate

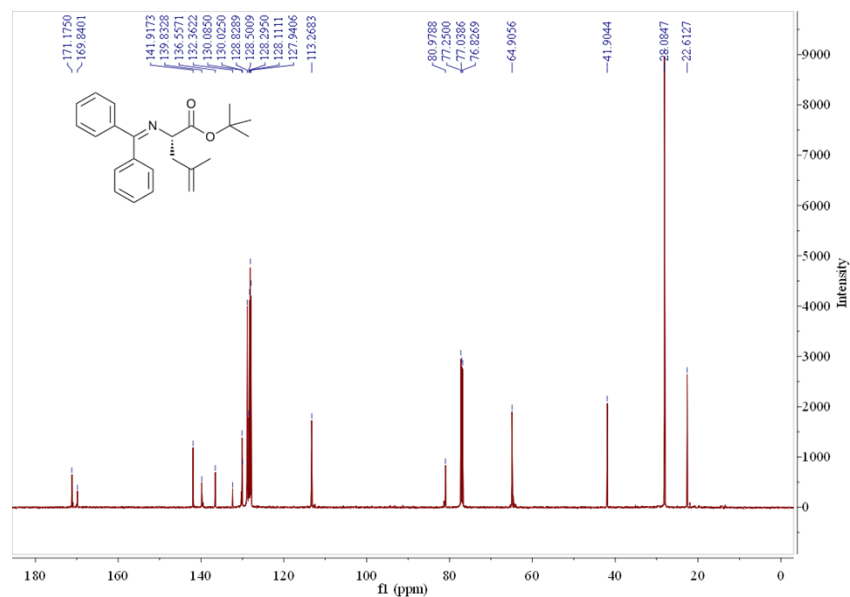

**Fig.52**  $^{13}\text{C}$  NMR spectra of *tert*-butyl 3-(1-methylvinyl)-2-(diphenylmethyleneamino)propanoate

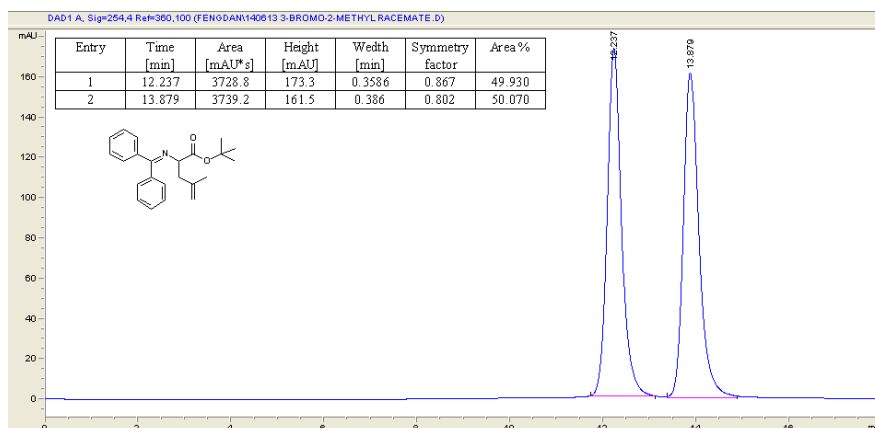

**Fig.53** The HPLC chromatogram of racemic *tert*-butyl 3-(1-methylvinyl)-2-(diphenylmethyleneamino)propanoate

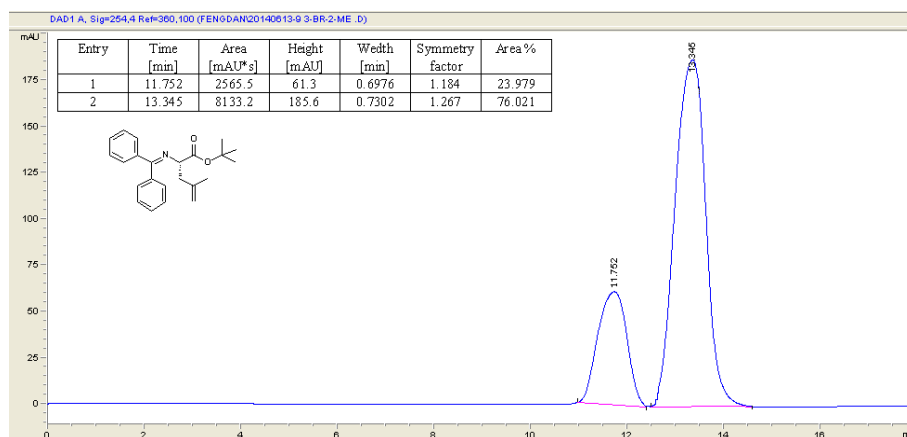

**Fig.54** The HPLC chromatogram of *tert*-butyl 3-(1-methylvinyl)-2-(diphenylmethyleamino)propanoate catalyzed by SiO<sub>2</sub>@CDPTC

***tert*-Butyl 3-ethynyl-2-(diphenylmethyleamino)propanoate (Entry 13 in Table 2).**

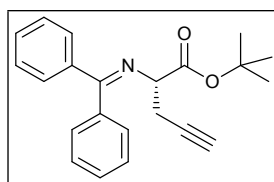

<sup>1</sup>H NMR (600.1 MHz, CDCl<sub>3</sub>, TMS): δ 7.81 (d, <sup>3</sup>J = 7.2 Hz, 1H, Ph-H), 7.66 (d, <sup>3</sup>J = 7.4 Hz, 2H, Ph-H), 7.51 – 7.43 (m, 4H, Ph-H), 7.40 (t, <sup>3</sup>J = 7.3 Hz, 1H, Ph-H), 7.33 (t, <sup>3</sup>J = 7.6 Hz, 2H, Ph-H), 4.18 (dd, <sup>3</sup>J = 8.1, 5.2 Hz, 1H, NCH), 2.84 – 2.76 (m, 2H, CH<sub>2</sub>), 1.95 (t, <sup>3</sup>J = 2.6 Hz, 1H, ≡CH), 1.45 (s, 9H, CH<sub>3</sub>); <sup>13</sup>C NMR (150.9 MHz, CDCl<sub>3</sub>, TMS) δ 171.4, 169.5 (C=N, C=O), 139.6, 137.7, 136.3, 132.4, 130.3, 130.0, 129.0, 128.6, 128.3, 128.3, 128.0 (Ph-C), 81.6 (≡CH), 81.3 (O-C), 70.0 (≡C-), 64.8 (N-C), 28.0 (CH<sub>3</sub>), 23.4 (CH<sub>2</sub>); HPLC analysis: Phenomenex Lux 5u Amylose-2, hexane/dioxane = 95/5, 254 nm, flow rate = 0.5 ml/min, retention times: 13.6 min (R), 16.3 min (S).

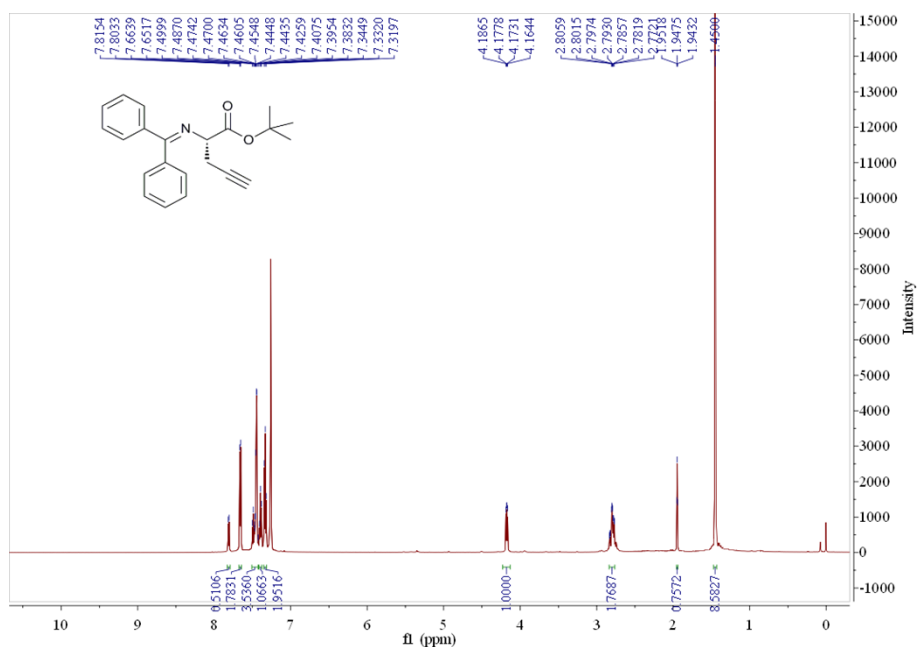

**Fig.55** <sup>1</sup>H NMR spectra of *tert*-butyl 3-ethynyl-2-(diphenylmethyleamino)propanoate

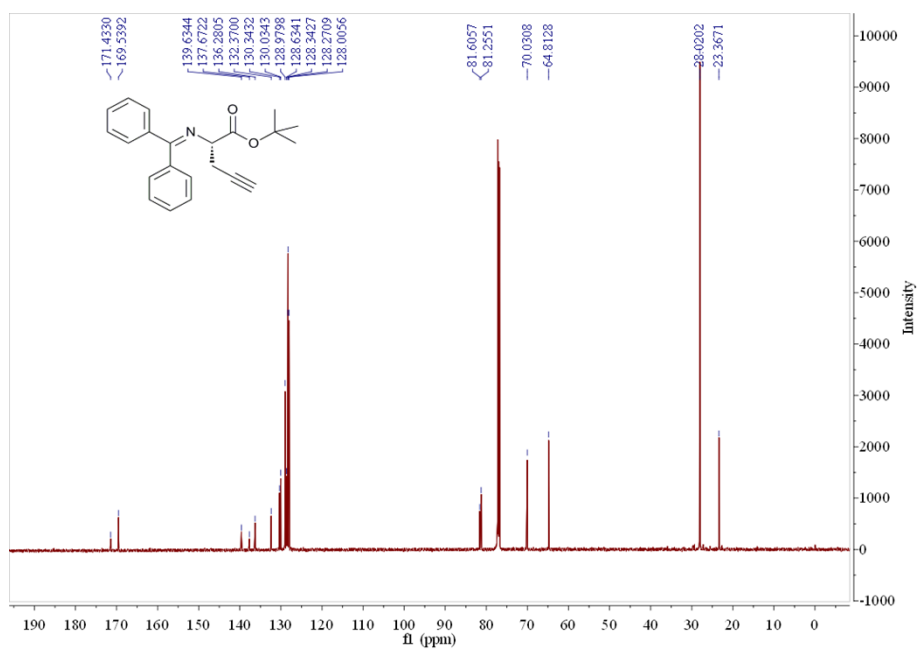

**Fig.56**  $^{13}\text{C}$  NMR spectra of *tert*-butyl 3-ethynyl-2-(diphenylmethyleamino)propanoate

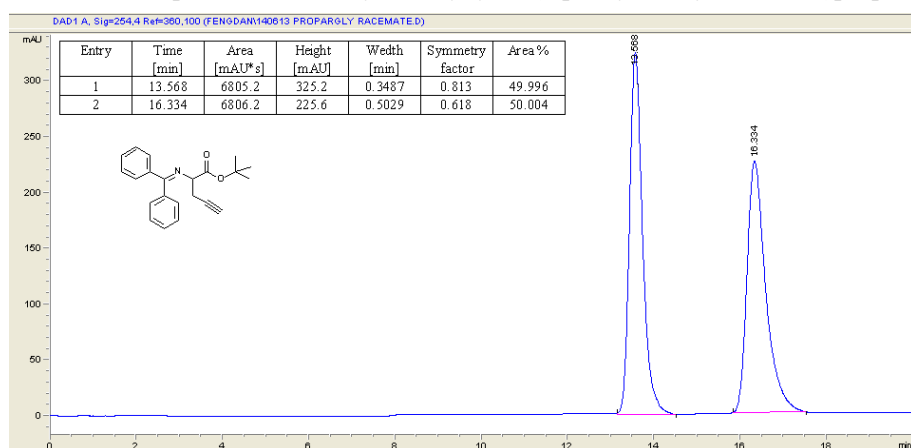

**Fig.57** The HPLC chromatogram of racemic *tert*-butyl 3-ethynyl-2-(diphenylmethyleamino)propanoate

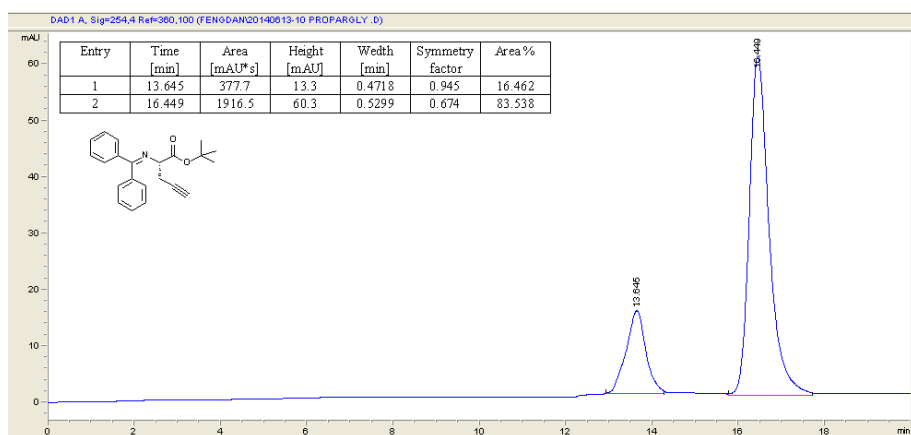

**Fig.58** The HPLC chromatogram of *tert*-butyl 3-ethynyl-2-(diphenylmethyleamino)propanoate catalyzed by  $\text{SiO}_2@\text{CDPTC}$

***tert*-Butyl 3-(4-nitrophenyl)-2-(diphenylmethyleneamino)propanoate (Entry 14 in Table 2).**

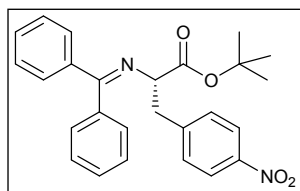

$^1\text{H}$  NMR (600.1 MHz,  $\text{CDCl}_3$ , TMS)  $\delta$  8.00 (d,  $^3J = 8.7$  Hz, 2H, Ph-H), 7.76 – 7.73 (m, 1H, Ph-H), 7.52 (dd,  $^3J = 17.6$ , 7.4 Hz, 2H, Ph-H), 7.42 (t,  $^3J = 7.7$  Hz, 1H, Ph-H), 7.33 (dd,  $^3J = 14.3$ , 7.3 Hz, 2H, Ph-H), 7.19 (d,  $^3J = 7.4$  Hz, 4H, Ph-H), 6.65 (d,  $^3J = 6.1$  Hz, 2H, Ph-H), 4.14 – 4.10 (m, 1H, NCH), 3.25 (d,  $^3J = 5.7$  Hz, 2H,  $\text{CH}_2$ ), 1.38 (s, 9H,  $\text{CH}_3$ );  $^{13}\text{C}$  NMR (150.9 MHz,  $\text{CDCl}_3$ )  $\delta$  170.0, 169.1 (C=N, C=O), 145.7, 145.5, 138.1, 136.7, 135.0, 131.4, 129.7, 129.5, 129.0, 127.7, 127.6, 127.3, 127.3, 127.1, 126.5, 122.9, 122.8, 122.2 (Ph-C), 80.7 (O-C), 66.0 (N-C), 38.4 ( $\text{CH}_2$ ), 27.0 ( $\text{CH}_3$ ); HPLC analysis: Phenomenex Lux 5u Amylose-2, hexane/dioxane = 90/10, 254 nm, flow rate = 0.5 ml/min, retention times: 19.6 min (R), 24.1 min (S).

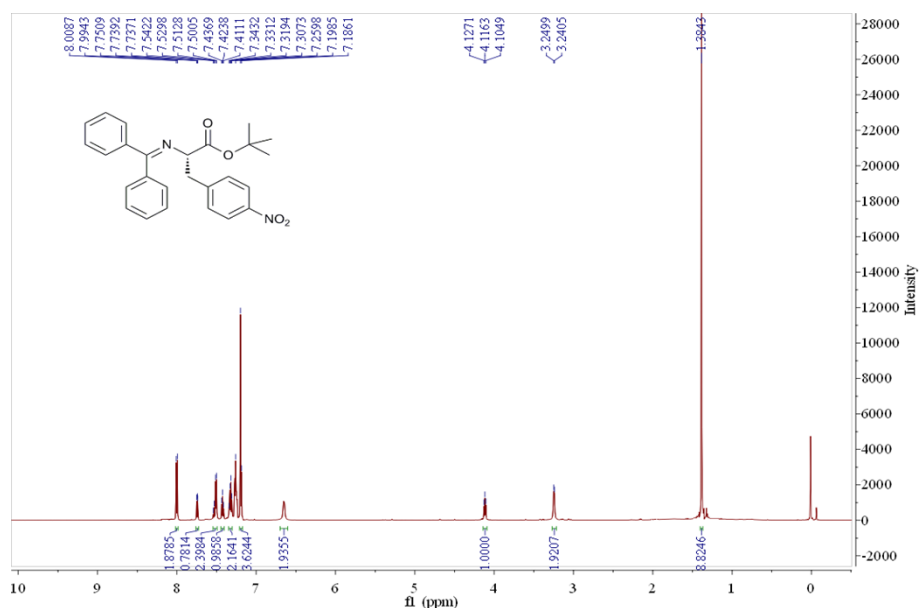

**Fig.59**  $^1\text{H}$  NMR spectra of *tert*-butyl 3-(4-nitrophenyl)-2-(diphenylmethyleneamino)propanoate

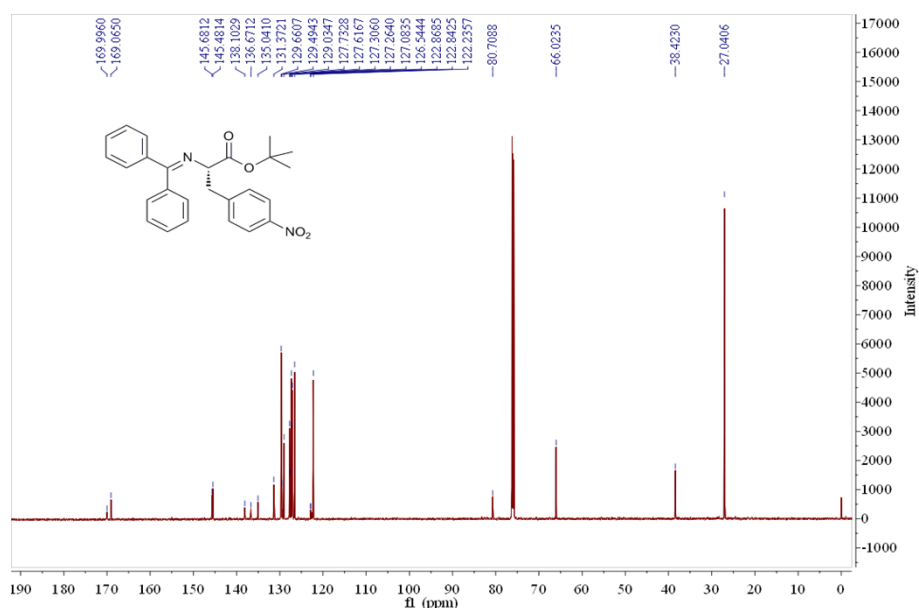

**Fig.60**  $^{13}\text{C}$  NMR spectra of *tert*-butyl 3-(4-nitrophenyl)-2-(diphenylmethyleneamino)propanoate

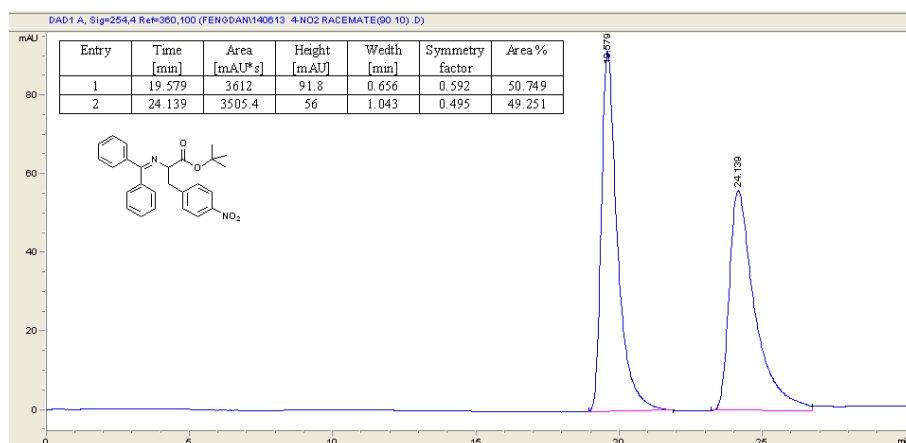

**Fig.61** The HPLC chromatogram of racemic *tert*-butyl 3-(4-nitrophenyl)-2-(diphenylmethyleneamino)propanoate

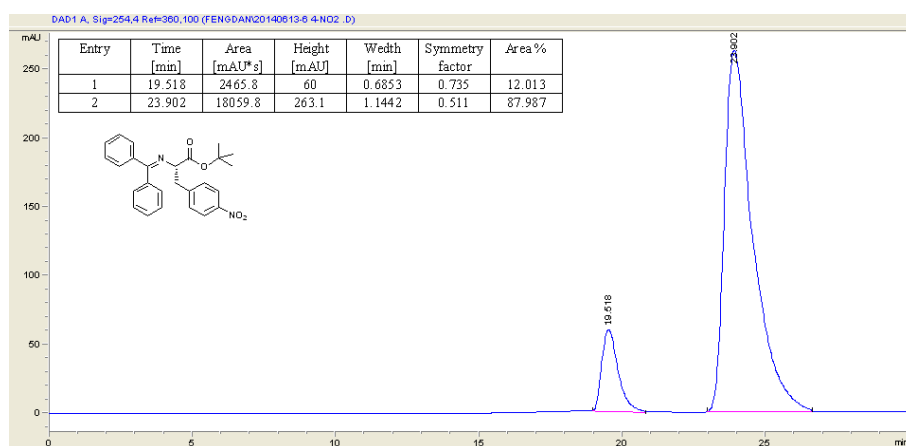

**Fig.62** The HPLC chromatogram of *tert*-butyl 3-(4-nitrophenyl)-2-(diphenylmethyleneamino)propanoate catalyzed by  $\text{SiO}_2@CDPTC$

***tert*-Butyl 3-(3-nitrophenyl)-2-(diphenylmethyleneamino)propanoate (Entry 15 in Table 2).**

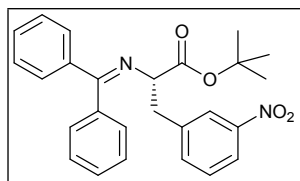

$^1\text{H}$  NMR (600.1 MHz,  $\text{CDCl}_3$ , TMS):  $\delta$  8.04 (ddd,  $^3J = 8.1, 2.2, 0.9$  Hz, 1H, Ph-H), 7.95 – 7.94 (m, 1H, Ph-H), 7.82 – 7.80 (m, 1H, Ph-H), 7.59 – 7.56 (m, 2H, Ph-H), 7.48 (dd,  $^3J = 18.0, 7.8$  Hz, 1H, Ph-H), 7.37 (dd,  $^3J = 6.8, 5.3$  Hz, 2H, Ph-H), 7.34 – 7.29 (m, 4H, Ph-H), 6.72 (d,  $^3J = 6.1$  Hz, 2H, Ph-H), 4.19 (dd,  $^3J = 8.2, 5.1$  Hz, 1H, NCH), 3.35 – 3.26 (m, 2H,  $\text{CH}_2$ ), 1.45 (s, 9H,  $\text{CH}_3$ );  $^{13}\text{C}$  NMR (150.9 MHz,  $\text{CDCl}_3$ )  $\delta$  171.1, 170.1 (C=N, C=O), 148.1, 140.6, 139.1, 137.7, 136.2, 136.1, 132.4, 130.5, 130.0, 128.9, 128.8, 128.7, 128.3, 128.3, 128.1, 127.5, 124.7, 121.4 (Ph-C), 81.7 (O-C), 67.0 (N-C), 39.2 ( $\text{CH}_2$ ), 28.0 ( $\text{CH}_3$ ); HPLC analysis: Phenomenex Lux 5u Amylose-2, hexane/dioxane = 90/10, 254 nm, flow rate = 0.5 ml/min, retention times: 20.0 min (R), 25.2 min (S).

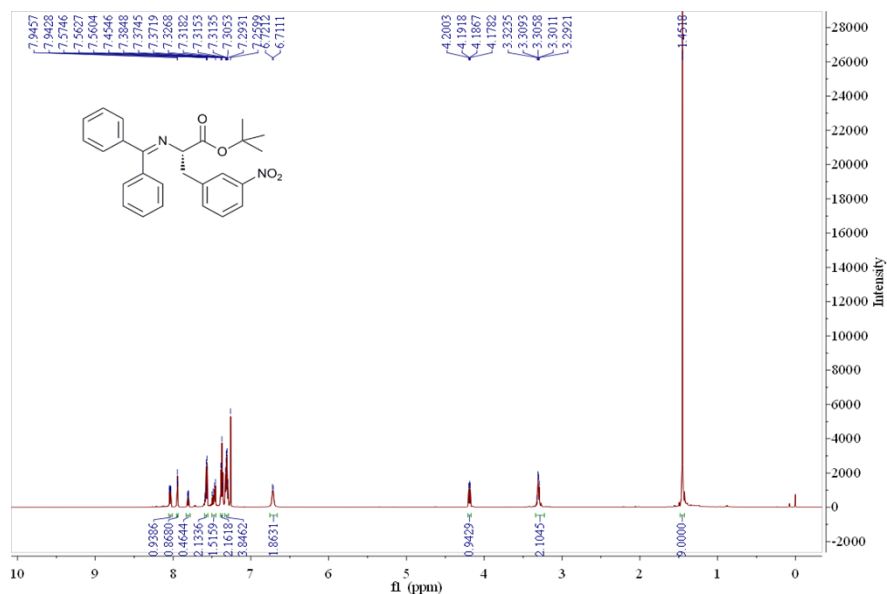

Fig.63  $^1\text{H}$  NMR spectra of *tert*-butyl 3-(3-nitrophenyl)-2-(diphenylmethyleneamino)propanoate

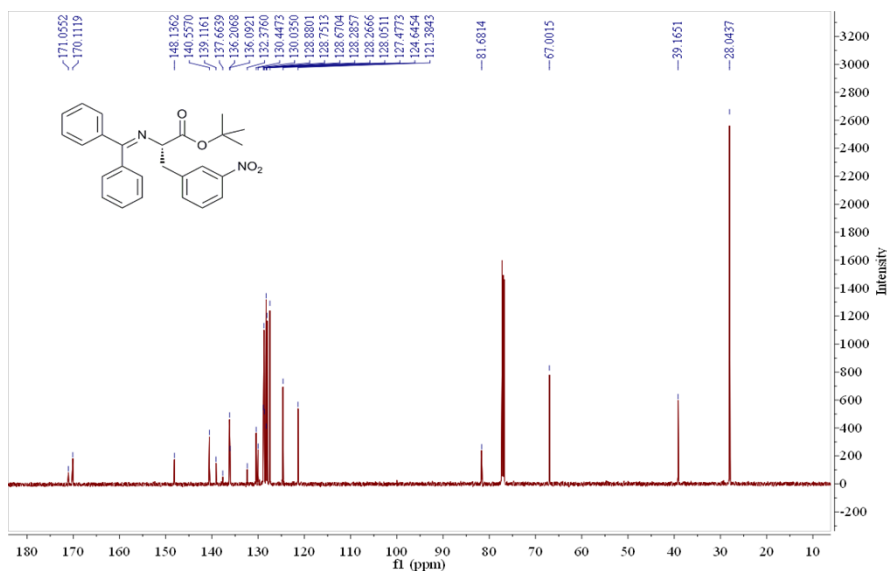

Fig.64  $^{13}\text{C}$  NMR spectra of *tert*-butyl 3-(3-nitrophenyl)-2-(diphenylmethyleneamino)propanoate

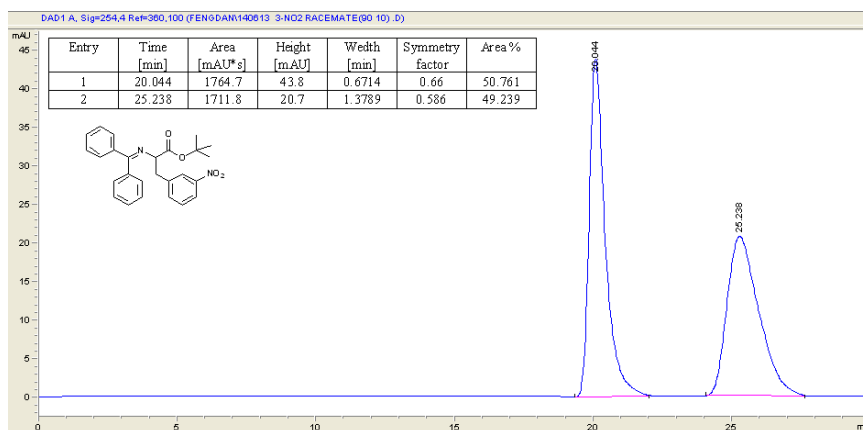

Fig.65 The HPLC chromatogram of racemic *tert*-butyl 3-(3-nitrophenyl)-2-(diphenylmethyleneamino)propanoate

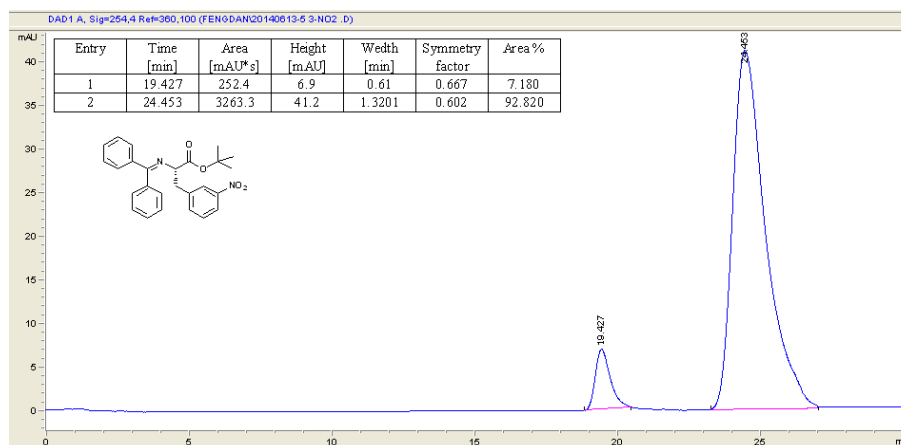

**Fig.66** The HPLC chromatogram of *tert*-butyl 3-(3-nitrophenyl)-2-(diphenylmethyleamino)propanoate catalyzed by SiO<sub>2</sub>@CDPTC

***tert*-Butyl 3-(2-nitrophenyl)-2-(diphenylmethyleamino)propanoate (Entry 7 in Table 2).**

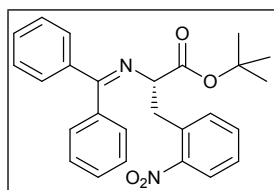

<sup>1</sup>H NMR (600.1 MHz, CDCl<sub>3</sub>, TMS): δ 8.05 – 7.98 (m, 1H, Ph-H), 7.97 – 7.88 (m, 1H, Ph-H), 7.80 (dd, <sup>3</sup>J = 8.2, 3.4 Hz, 1H, Ph-H), 7.76 – 7.74 (m, 1H, Ph-H), 7.66 – 7.60 (m, 1H, Ph-H), 7.51 (dd, <sup>3</sup>J = 7.0, 4.3 Hz, 2H, Ph-H), 7.45 – 7.36 (m, 2H, Ph-H), 7.32 (d, <sup>3</sup>J = 6.8 Hz, 2H, Ph-H), 7.20 (d, <sup>3</sup>J = 4.7 Hz, 2H, Ph-H), 6.56 (s, 1H, Ph-H), 4.29 – 4.24 (m, 1H, NCH), 3.48 – 3.32 (m, 2H, CH<sub>2</sub>), 1.38 (s, 9H, CH<sub>3</sub>); <sup>13</sup>C NMR (150.9 MHz, CDCl<sub>3</sub>, TMS): δ 170.04, 169.19 (C=N, C=O), 148.70, 138.22, 136.68, 135.00, 133.10, 131.41, 131.36, 129.29, 129.02, 128.32, 127.78, 127.47, 127.26, 127.17, 126.94, 126.42, 123.62, 123.58, 80.43 (O-C), 64.96 (N-C), 35.40 (CH<sub>2</sub>), 27.02 (CH<sub>3</sub>); HPLC analysis: Phenomenex Lux 5u Amylose-2, hexane/dioxane = 90/10, 254 nm, flow rate = 0.5 ml/min, retention times: 19.1 min (R), 23.7 min (S).

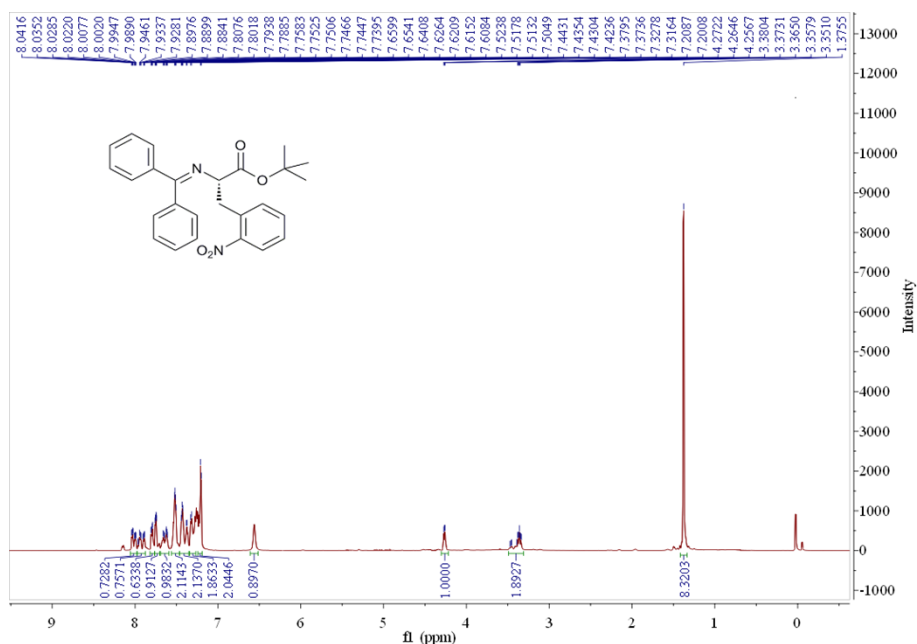

**Fig.67** <sup>1</sup>H NMR spectra of *tert*-butyl 3-(2-nitrophenyl)-2-(diphenylmethyleamino)propanoate

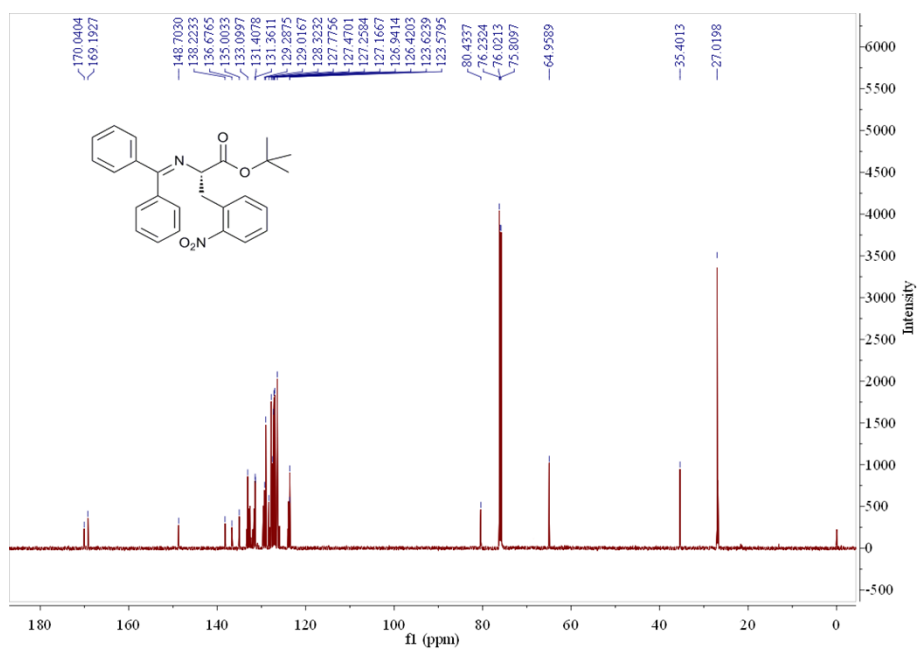

**Fig.68**  $^{13}\text{C}$  NMR spectra of *tert*-butyl 3-(2-nitrophenyl)-2-(diphenylmethyleneamino)propanoate

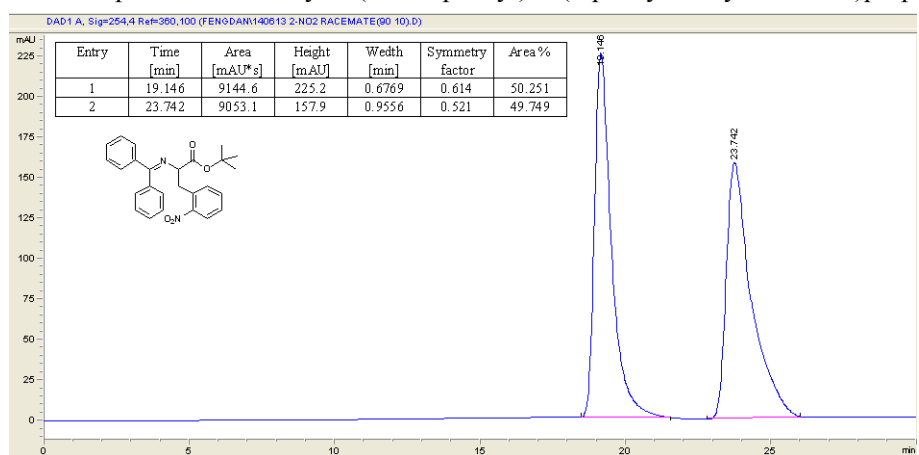

**Fig.69** The HPLC chromatogram of racemic *tert*-butyl 3-(2-nitrophenyl)-2-(diphenylmethyleneamino)propanoate

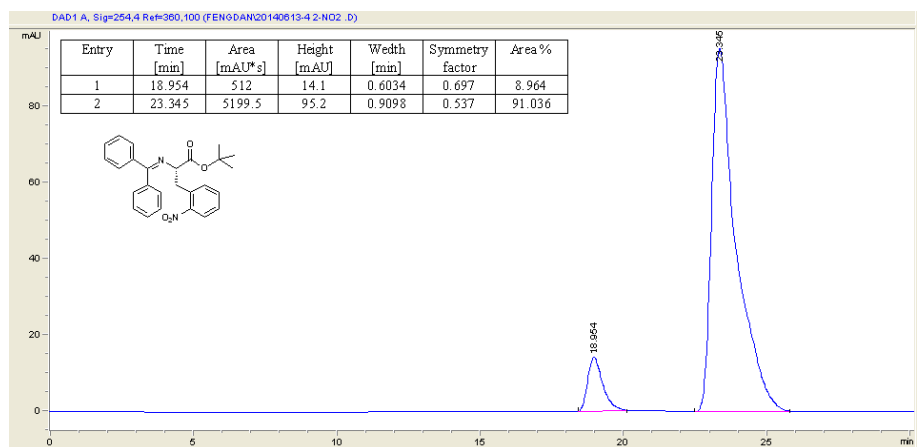

**Fig.70** The HPLC chromatogram of *tert*-butyl 3-(2-nitrophenyl)-2-(diphenylmethyleneamino)propanoate catalyzed by  $\text{SiO}_2@\text{CDPTC}$



## X-ray diffraction and elemental analysis of SiO<sub>2</sub>@CDPTC

X-ray powder diffractions were carried out on an XRD-7000 S/L instrument: Cu-K $\alpha$  radiation, X-ray tube settings of 40.0kV/30.0 mA, a scan speed of 2°/min in the 10–100° (2 $\theta$ ) range. X-ray diffraction of SiO<sub>2</sub>@CD/PTC (Fig. 71) indicate that the structure is amorphous.

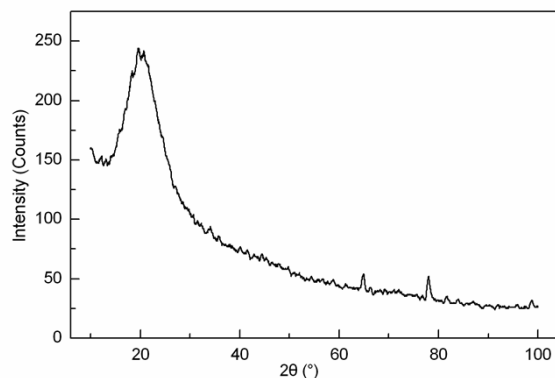

Fig.71 X-ray diffraction patterns of SiO<sub>2</sub>@CDPTC

## The recovery and reuse of catalyst

The data of the yields and enantioselectivities of  $\alpha$ -alkylation product *tert*-Butyl 3-phenyl-2-(diphen-ylmethyleneamino)propanoate in reused process were shown in the following Table 1 and Fig. 72.

Table 1 Reusability of SiO<sub>2</sub>@CDPTC under optimized reaction conditions

| Entry | Temp.(°C) | Reaction times | Yield <sup>a</sup> (%) | %ee <sup>b</sup> |
|-------|-----------|----------------|------------------------|------------------|
| 1     | -40       | 1              | 95                     | 96.3             |
| 2     | -40       | 2              | 93                     | 94.7             |
| 3     | -40       | 3              | 92                     | 94.0             |
| 4     | -40       | 4              | 90                     | 93.0             |
| 5     | -40       | 5              | 88                     | 91.6             |
| 6     | -40       | 6              | 80                     | 91.2             |

Reaction conditions: 20 mol% SiO<sub>2</sub>@CDPTC, -40 °C, benzyl bromide ( 2.5 mmol), *N*-(diphenylmethylene)glycine ethyl ester (150.0 mg, 0.51 mmol), 50% aq KOH (1.0 mL, 13.4 mmol), 4.0 mL toluene. <sup>a</sup> Isolated yield. <sup>b</sup> Determined by chiral HPLC with Phenomenex Lux 5u Amylose-2 chiral column.

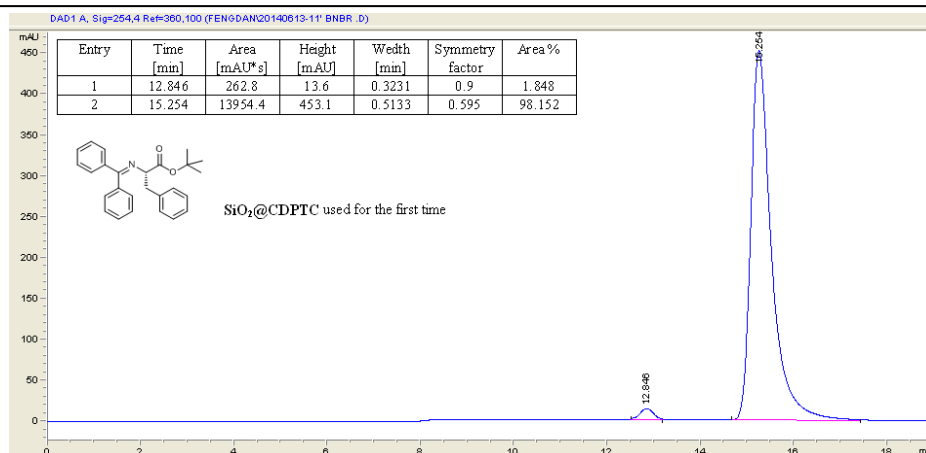

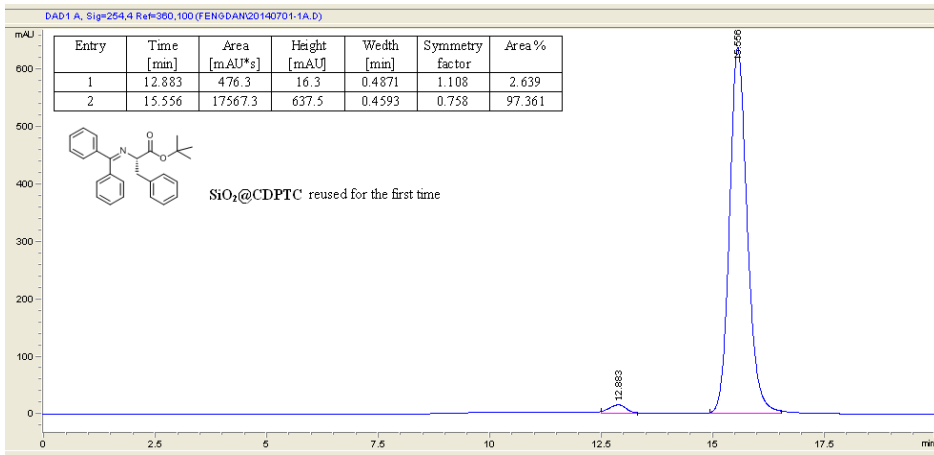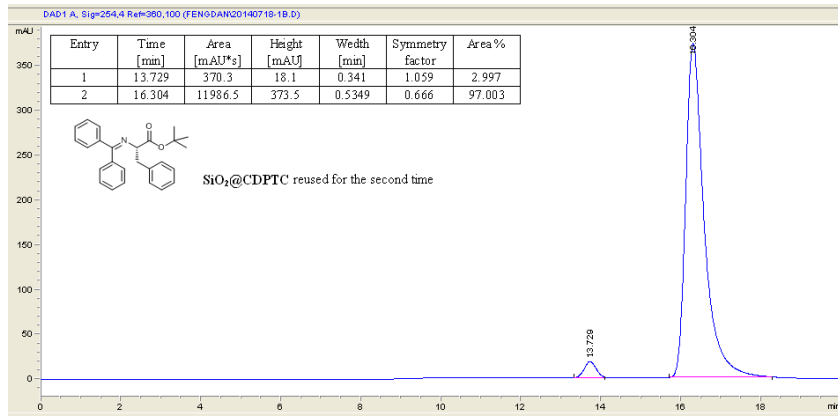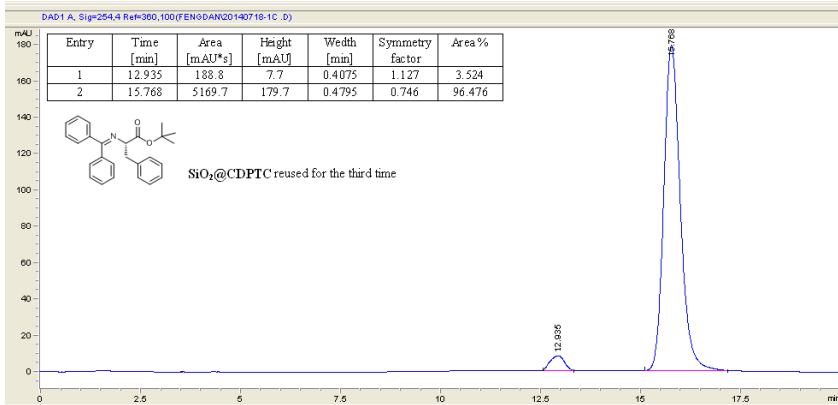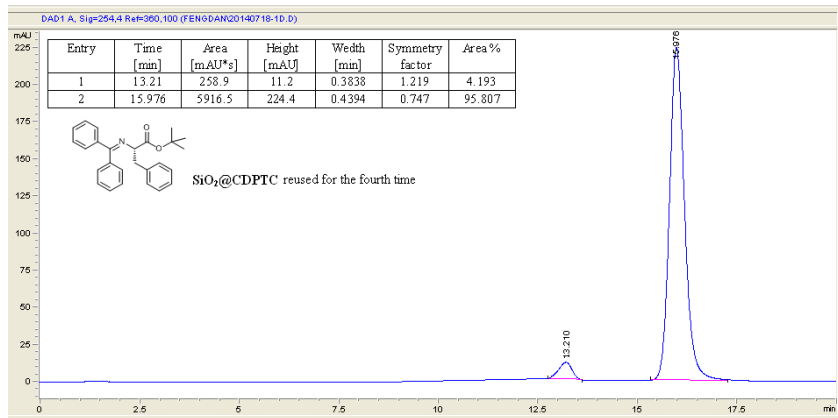

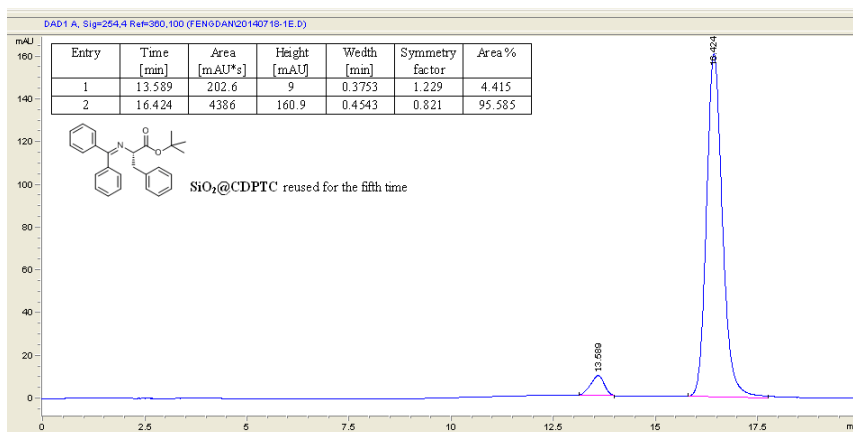

Fig.72 The HPLC chromatogram of *tert*-butyl 3-phenyl-2-(diphenylmethyleneamino)propanoate in the six times

### HPLC chromatogram of homogeneous CDPTC

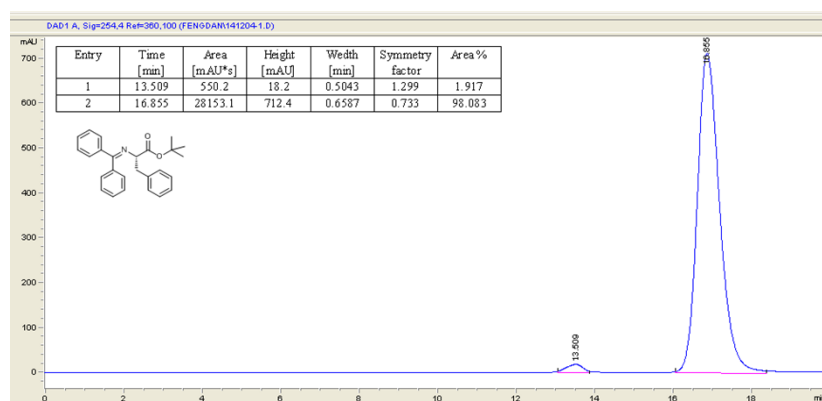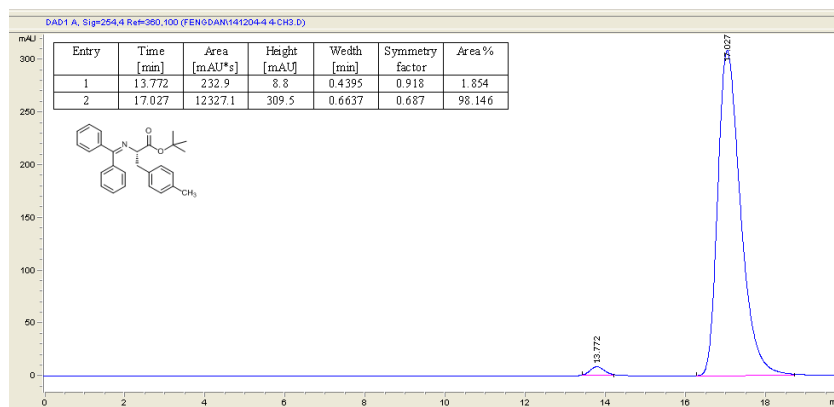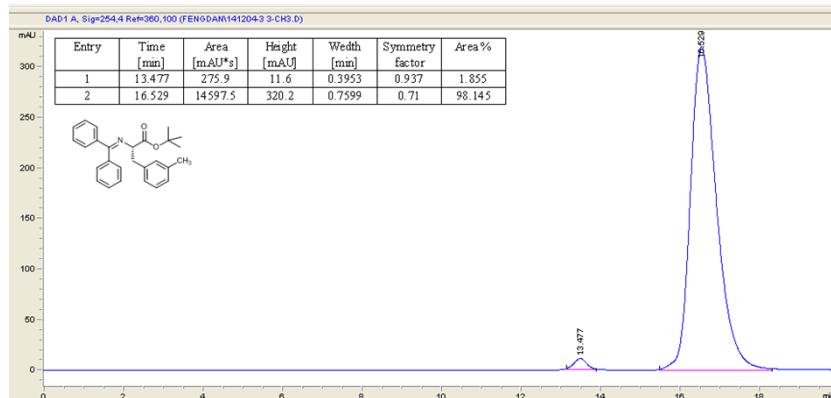

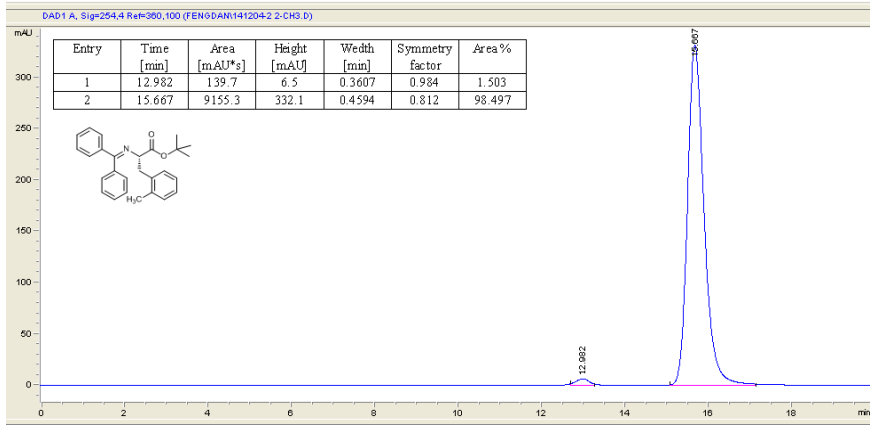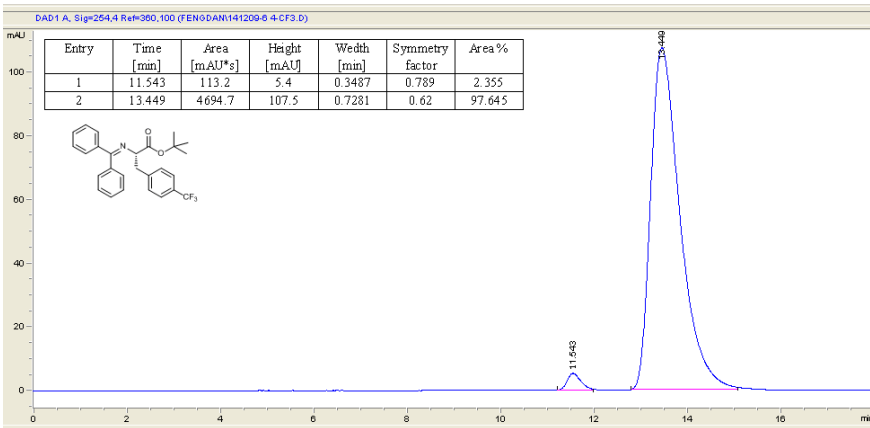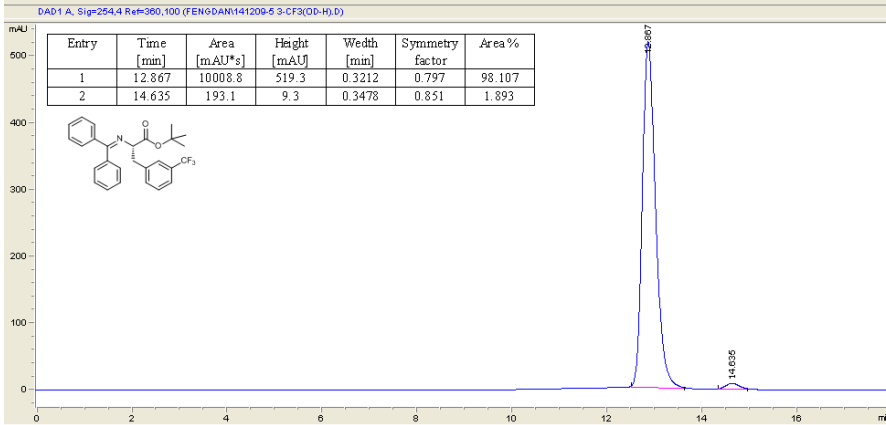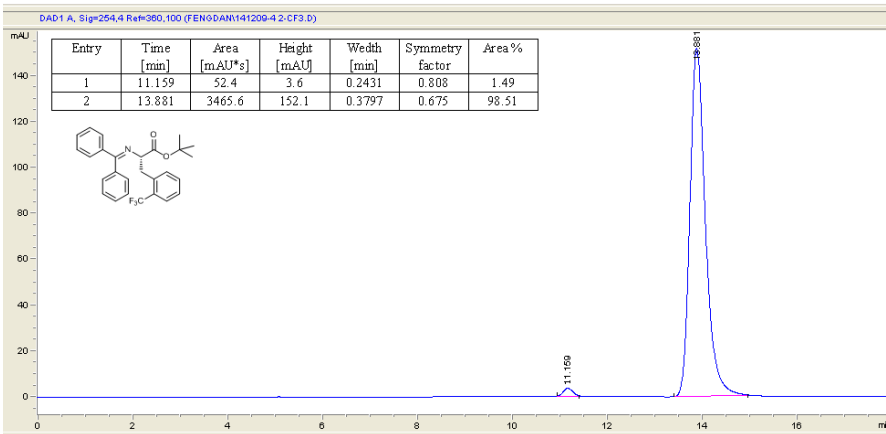

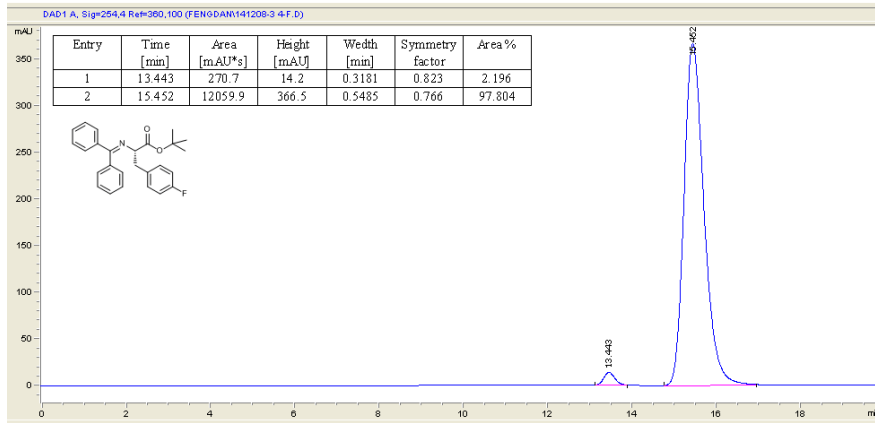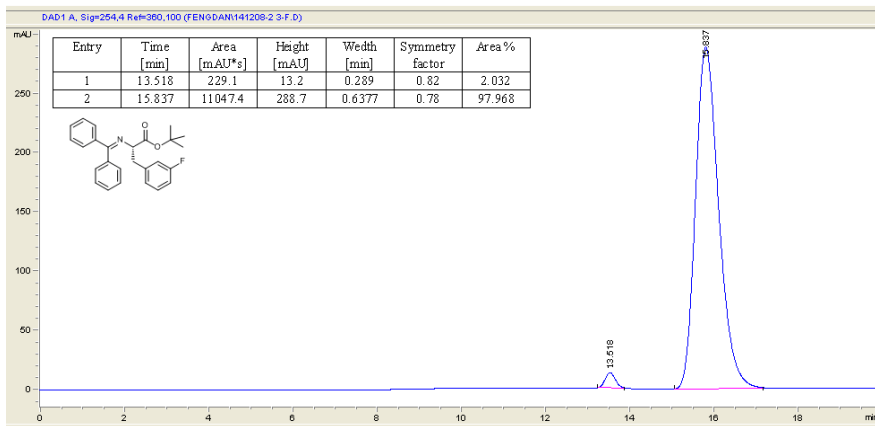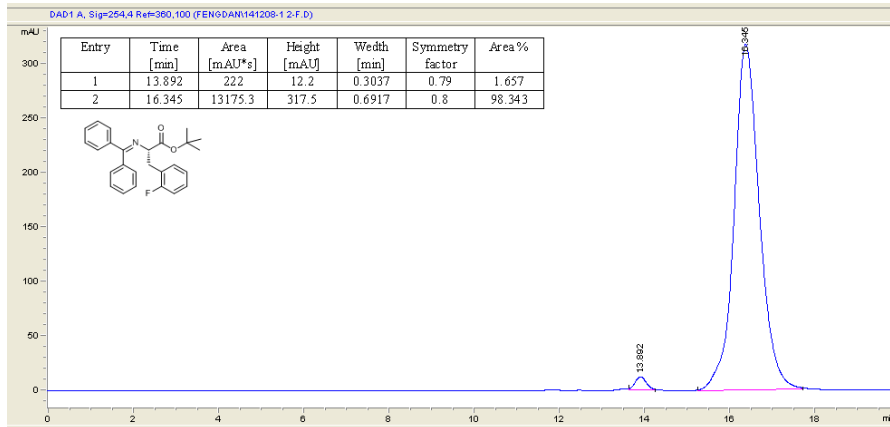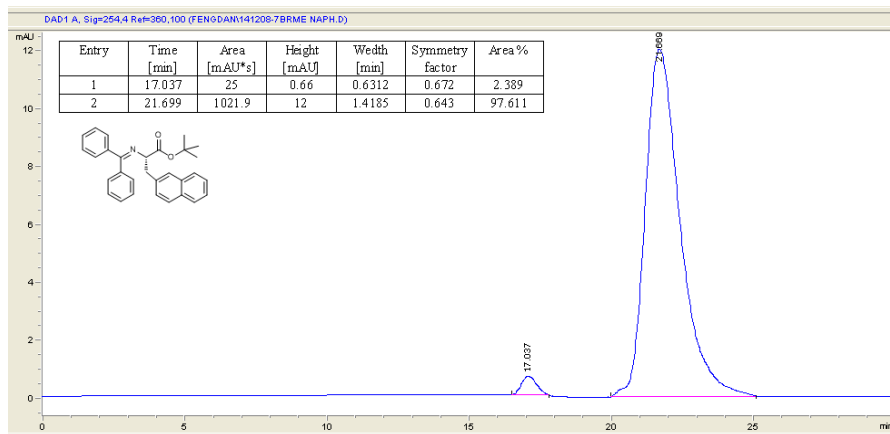

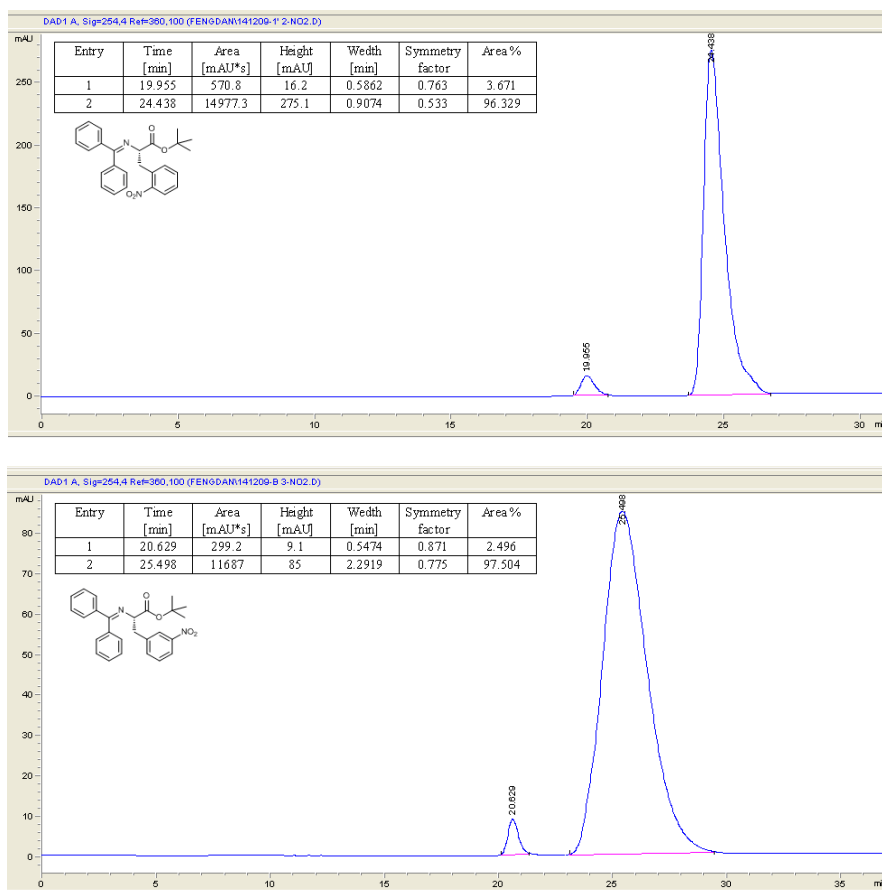

**Fig.73** HPLC chromatogram of various electrophiles catalyzed by homogeneous CDPTC

**N<sub>2</sub> adsorption–desorption isotherm of deeply hydrolytic SiO<sub>2</sub>@CDPTC**

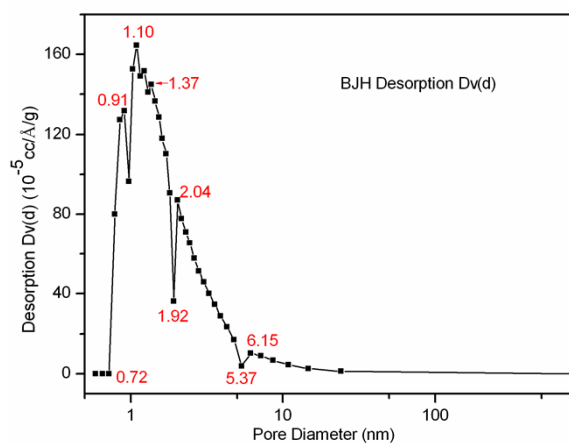

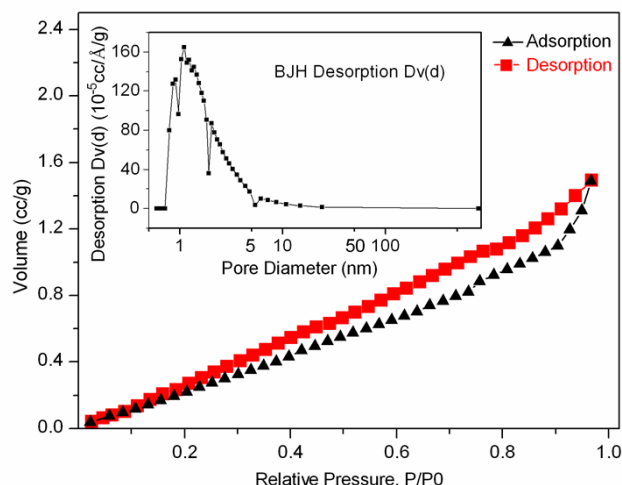

**Fig.74**  $N_2$  adsorption–desorption isotherms of deeply hydrolytic  $SiO_2@CDPTC$  and pore size distributions from BJH analysis based on desorption isotherm

## An analogues of CDPTC

To a round-bottomed flask (100 mL) was charged with *N*-(2-cyanobenzyl)-*O*(9)-allyl- cinchonidinium bromide (265.3 mg, 0.5 mmol), mercaptan (124.3 mg, 2.0 mmol) and AIBN (16.4 mg, 0.1 mmol), flushed three times with Ar atmosphere and sealed. Then  $CHCl_3$  (30 mL) was added by a syringe and the reaction mixture was refluxed for 72 h at 80 °C with the tracking of TLC. During the reaction, AIBN (16.4 mg, 0.1 mmol) was added once per 24 hours. After the solvent was evaporated under reduced pressure, the residue was subjected to flash column chromatography by gradient elution with  $CHCl_3/CH_3OH$  ( $v/v=60/1 \rightarrow 30/1 \rightarrow 15/1$ ) to obtain the pale yellow solid (474.1 mg, 80%).

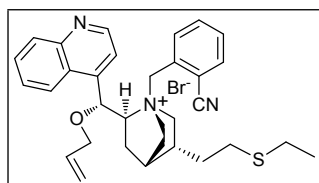

$^1H$  NMR (600.1 MHz,  $CD_3OD$ , TMS)  $\delta$  9.02 (d,  $^3J = 4.5$  Hz, 1H, Ph-H), 8.42 (d,  $^3J = 8.1$  Hz, 1H, Ph-H), 8.22 (d,  $^3J = 7.6$  Hz, 1H, Ph-H), 8.19 (dd,  $^3J = 7.5, 6.7$  Hz, 1H, Ph-H), 8.06 (d,  $^3J = 7.7$  Hz, 1H, Ph-H), 7.96 (dd,  $^3J = 11.1, 4.3$  Hz, 1H, Ph-H), 7.94 – 7.86 (m, 3H, Ph-H), 7.84 (t,  $^3J = 7.7$  Hz, 1H, Ph-H), 6.55 (d,  $^3J = 18.7$  Hz, 1H, O-CH), 6.33 – 6.24 (m, 1H, -CH=), 5.78 – 5.69 (m, 1H, =CH<sub>2</sub>), 5.49 (dd,  $^3J = 17.2, 1.1$  Hz, 1H, =CH<sub>2</sub>), 5.38 (dt,  $^3J = 14.9, 11.7$  Hz, 3H, N<sup>+</sup>-CH, N<sup>+</sup>-CH<sub>2</sub>), 5.22 (dd,  $^3J = 16.5, 8.3$  Hz, 1H, O-CH<sub>2</sub>), 5.03 (t,  $^3J = 9.2$  Hz, 1H, O-CH<sub>2</sub>), 4.58 (ddd,  $^3J = 16.3, 11.3, 5.0$  Hz, 1H, N<sup>+</sup>-CH<sub>2</sub>), 4.45 (dd,  $^3J = 11.9, 5.9$  Hz, 1H, N<sup>+</sup>-CH<sub>2</sub>), 4.17 (ddd,  $^3J = 25.7, 14.2, 7.2$  Hz, 2H, N<sup>+</sup>-CH<sub>2</sub>), 3.97 (ddd,  $^3J = 12.5, 8.6, 4.4$  Hz, 1H, S-CH<sub>2</sub>), 3.77 – 3.63 (m, 2H, S-CH<sub>2</sub>), 3.45 (td,  $^3J = 11.3, 4.3$  Hz, 1H, S-CH<sub>2</sub>), 2.84 – 2.77 (m, 1H, CH), 2.62 (q,  $^3J = 7.4$  Hz, 1H, CH), 2.48 – 2.41 (m, 1H, CH<sub>2</sub>), 2.31 – 2.24 (m, 1H, CH<sub>2</sub>), 2.15 (t,  $^3J = 8.8$  Hz, 1H, CH<sub>2</sub>), 2.02 – 1.94 (m, 1H, CH<sub>2</sub>), 1.58 – 1.51 (m, 2H, CH<sub>2</sub>), 1.33 (ddd,  $^3J = 23.4, 16.8, 7.1$  Hz, 3H, CH<sub>3</sub>);  $^{13}C$  NMR (150.9 MHz,  $CD_3OD$ , TMS)  $\delta$  149.61, 147.88, 141.55, 137.06, 135.67, 134.09, 133.57, 133.12, 131.37, 130.00, 129.18, 128.15, 125.42, 122.97, 120.01, 118.31, 117.72, 116.37, 72.82, 70.14, 68.72, 61.70, 60.89, 52.12, 37.55, 29.32, 27.86, 26.28, 25.27, 24.58, 21.74, 13.82.

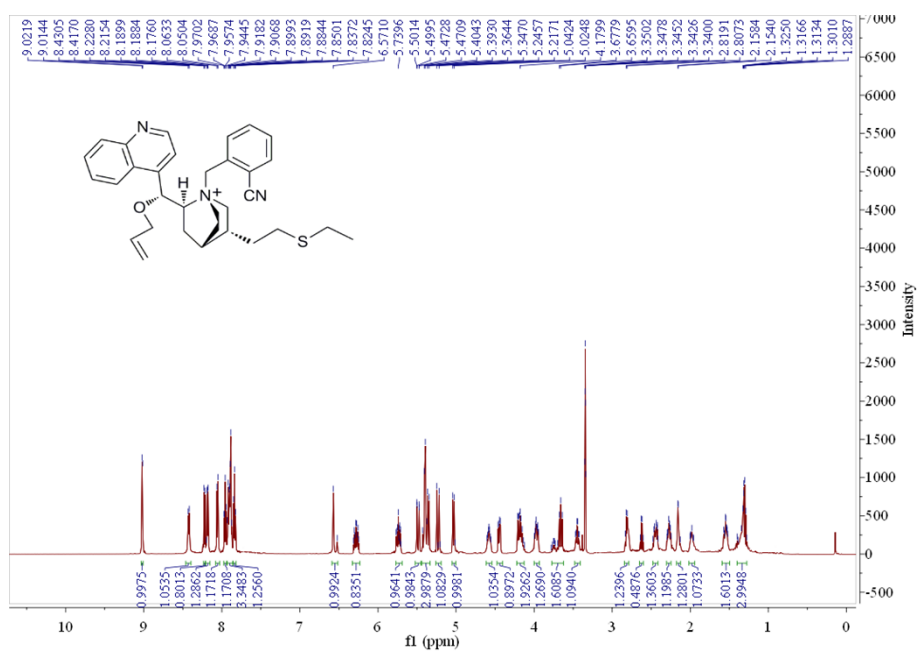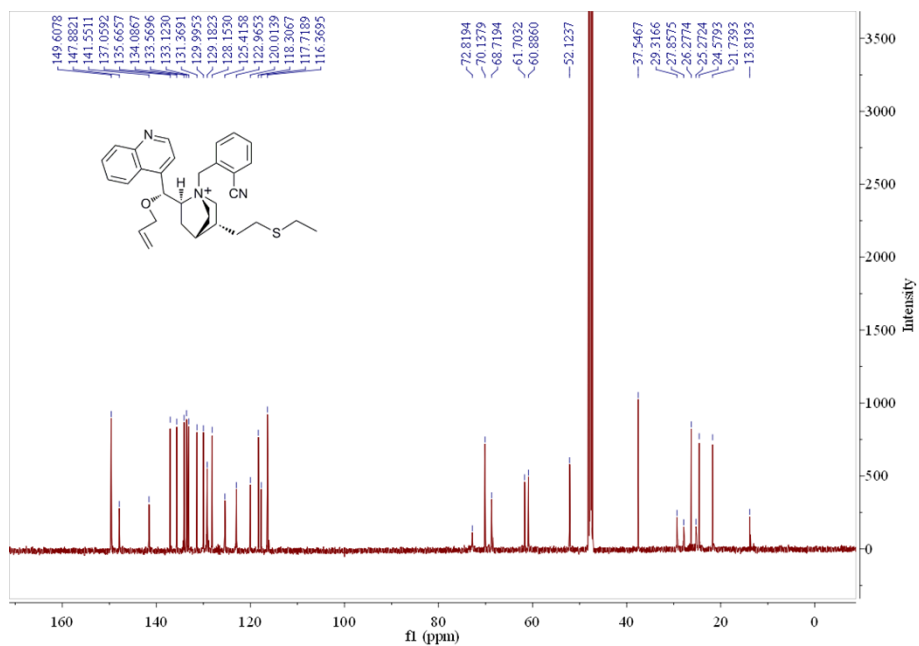

By comparison of <sup>1</sup>H NMR spectra, it was found that the peaks of hydrogens attached to endocyclic carbon-carbon double bond disappeared, which demonstrated that the free radical addition of sulfydryl in 3-MPTS was added to endocyclic carbon-carbon double bond.



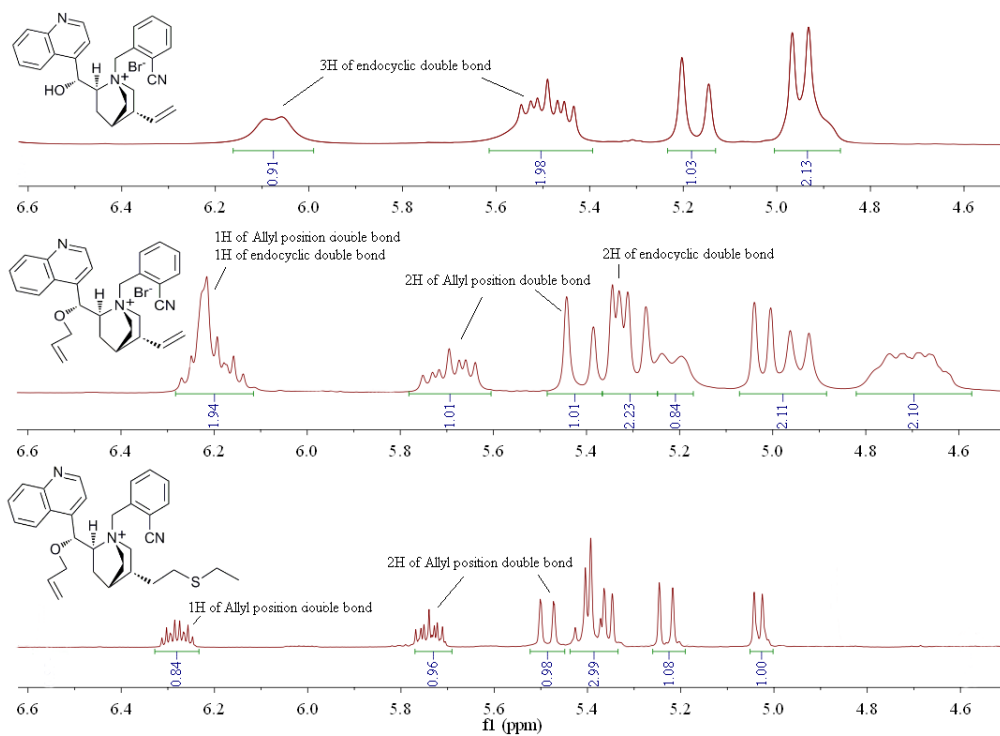

Supplement: c4cy01518e1.pdf [file c4cy01518e1.pdf]
